# Supplementary material for: The Role of Promyelocytic Leukemia Protein in Steatosis-Associated Hepatic Tumors Related to Chronic Hepatitis B virus Infection
Source: PubMed Central journal article supplement — Transl Oncol. 2018 Apr 24;11(3):743–54. doi: 10.1016/j.tranon.2018.03.013 (PMC6050444; doi:10.1016/j.tranon.2018.03.013), 2018-04-24
Supplement: mmc1.pdf [file mmc1.pdf]

**Table S1.** The protein lists of common alterations in liver proteomics of young and aged *HBxAg<sup>1g/0</sup>* male mice.

| Young-common upregulation                                                     | Young-common downregulation                                                         | Aged-common upregulation                                                      | Aged-common downregulation                                                     |
|-------------------------------------------------------------------------------|-------------------------------------------------------------------------------------|-------------------------------------------------------------------------------|--------------------------------------------------------------------------------|
| Protein List                                                                  | Protein List                                                                        | Protein List                                                                  | Protein List                                                                   |
| Pre-mRNA-processing-splicing factor 8 < sp Q99PV0 PRP8_MOUSE >                | Vigilin < sp Q8VDJ3 VIGLN_MOUSE >                                                   | Pre-mRNA-processing-splicing factor 8 < sp Q99PV0 PRP8_MOUSE >                | Alpha-1,4 glucan phosphorylase < tr Q3UEJ6 Q3UEJ6_MOUSE >                      |
| Proteasome subunit alpha type-2 < sp P49722 PSA2_MOUSE >                      | Clathrin heavy chain < tr Q5SXR6 Q5SXR6_MOUSE >                                     | Proteasome subunit alpha type-2 < sp P49722 PSA2_MOUSE >                      | 39S ribosomal protein L3, mitochondrial < sp Q99N95 RM03_MOUSE >               |
| Beta-enolase < sp P21550 ENOB_MOUSE >                                         | D-beta-hydroxybutyrate dehydrogenase, mitochondrial < sp Q80XN0 BDH_MOUSE >         | Beta-enolase < sp P21550 ENOB_MOUSE >                                         | 40S ribosomal protein S21 < sp Q9CQR2 RS21_MOUSE >                             |
| Eno3 protein < tr Q4FK59 Q4FK59_MOUSE >                                       | Cytochrome P450 2C54 < sp Q6XVG2 CP254_MOUSE >                                      | Eno3 protein < tr Q4FK59 Q4FK59_MOUSE >                                       | Acyl-CoA synthetase family member 2, mitochondrial < sp Q8VCW8 ACSF2_MOUSE >   |
| MCG10343, isoform CRA_b < tr G5E902 G5E902_MOUSE >                            | Isochormatase domain-containing protein 2A, mitochondrial < sp P85094 ISC2A_MOUSE > | MCG10343, isoform CRA_b < tr G5E902 G5E902_MOUSE >                            | Alkylated DNA repair protein alkB homolog 1 < sp POCB42 ALKB1_MOUSE >          |
| Phosphate carrier protein, mitochondrial < sp Q8VEM8 MPCP_MOUSE >             | Mitochondrial 10-formyltetrahydrofolate dehydrogenase < sp Q8K009 AL1L2_MOUSE >     | Phosphate carrier protein, mitochondrial < sp Q8VEM8 MPCP_MOUSE >             | ATP-binding cassette sub-family A member 1 < sp P41233 ABCA1_MOUSE >           |
| Cytochrome b-c1 complex subunit 6, mitochondrial < sp P99028 QCR6_MOUSE >     | Long-chain-fatty-acid-CoA ligase 1 < sp P41216 ACSL1_MOUSE >                        | Cytochrome b-c1 complex subunit 6, mitochondrial < sp P99028 QCR6_MOUSE >     | Casein kinase II subunit beta < sp P67871 CSK2B_MOUSE >                        |
| Transmembrane emp24 domain-containing protein 4 < sp Q8R1V4 TMED4_MOUSE >     | 60S ribosomal protein L23 < sp P62830 RL23_MOUSE >                                  | Transmembrane emp24 domain-containing protein 4 < sp Q8R1V4 TMED4_MOUSE >     | Cathepsin H < tr Q922Q7 Q922Q7_MOUSE >                                         |
| Epoxide hydrolase 1 < sp Q9D379 HYEP_MOUSE >                                  | Glutathione S-transferase A2 < sp P10648 GSTA2_MOUSE >                              | Epoxide hydrolase 1 < sp Q9D379 HYEP_MOUSE >                                  | Centrosomal protein of 290 kDa < sp Q6A078 CE290_MOUSE >                       |
| Protein Ugt2b34 < tr Q8K154 Q8K154_MOUSE >                                    | Alpha-1,4 glucan phosphorylase < tr Q3UEJ6 Q3UEJ6_MOUSE >                           | Protein Ugt2b34 < tr Q8K154 Q8K154_MOUSE >                                    | Cocaine- and amphetamine-regulated transcript protein < sp P56388 CART_MOUSE > |
| Phosphoglucomutase 2 < tr Q5RJV4 Q5RJV4_MOUSE >                               | 39S ribosomal protein L3, mitochondrial < sp Q99N95 RM03_MOUSE >                    | Phosphoglucomutase 2 < tr Q5RJV4 Q5RJV4_MOUSE >                               | Collagen alpha-1(VI) chain < sp Q04857 CO6A1_MOUSE >                           |
| 14-3-3 protein zeta/delta < sp P63101 1433Z_MOUSE >                           | 40S ribosomal protein S21 < sp Q9CQR2 RS21_MOUSE >                                  | 14-3-3 protein zeta/delta < sp P63101 1433Z_MOUSE >                           | Dynein heavy chain 3, axonemal < sp Q8BW94 DYH3_MOUSE >                        |
| MCG1788 < tr Q3UEP4 Q3UEP4_MOUSE >                                            | Acyl-CoA synthetase family member 2, mitochondrial < sp Q8VCW8 ACSF2_MOUSE >        | MCG1788 < tr Q3UEP4 Q3UEP4_MOUSE >                                            | E3 ubiquitin-protein ligase UBR4 < sp A2AN08 UBR4_MOUSE >                      |
| CDGSH iron-sulfur domain-containing protein 1 < sp Q91WS0 CISD1_MOUSE >       | Alkylated DNA repair protein alkB homolog 1 < sp POCB42 ALKB1_MOUSE >               | CDGSH iron-sulfur domain-containing protein 1 < sp Q91WS0 CISD1_MOUSE >       | EGAM1 < tr Q3UL53 Q3UL53_MOUSE >                                               |
| Glutathione S-transferase A4 < sp P24472 GSTA4_MOUSE >                        | ATP-binding cassette sub-family A member 1 < sp P41233 ABCA1_MOUSE >                | Glutathione S-transferase A4 < sp P24472 GSTA4_MOUSE >                        | EGAM1N < tr B6ZND8 B6ZND8_MOUSE >                                              |
| Glutathione S-transferase Mu 3 < sp P19639 GSTM4_MOUSE >                      | Casein kinase II subunit beta < sp P67871 CSK2B_MOUSE >                             | Glutathione S-transferase Mu 3 < sp P19639 GSTM4_MOUSE >                      | Fgd6 protein < tr B2RSV7 B2RSV7_MOUSE >                                        |
| ATP synthase F(0) complex subunit B1, mitochondrial < sp Q9CQQ7 AT5F1_MOUSE > | Cathepsin H < tr Q922Q7 Q922Q7_MOUSE >                                              | ATP synthase F(0) complex subunit B1, mitochondrial < sp Q9CQQ7 AT5F1_MOUSE > | FYVE, RhoGEF and PH domain-containing protein 6 < sp Q69ZL1 FGD6_MOUSE >       |
| Ornithine aminotransferase, mitochondrial < sp P29758 OAT_MOUSE >             | Centrosomal protein of 290 kDa < sp Q6A078 CE290_MOUSE >                            | Ornithine aminotransferase, mitochondrial < sp P29758 OAT_MOUSE >             | Heme-binding protein 1 < sp Q9R257 HEBP1_MOUSE >                               |
| 60S ribosomal protein L23a < sp P62751 RL23A_MOUSE >                          | Cocaine- and amphetamine-regulated transcript protein < sp P56388 CART_MOUSE >      | 60S ribosomal protein L23a < sp P62751 RL23A_MOUSE >                          | Heterogeneous nuclear ribonucleoprotein A1 < sp P49312 ROA1_MOUSE >            |
| Alpha-1-antitrypsin 1-2 < sp P22599 A1AT2_MOUSE >                             | Collagen alpha-1(VI) chain < sp Q04857 CO6A1_MOUSE >                                | Alpha-1-antitrypsin 1-2 < sp P22599 A1AT2_MOUSE >                             | Hnrnpa112 protein < tr B7ZWG9 B7ZWG9_MOUSE >                                   |
| Hemoglobin subunit alpha < sp P01942 HBA_MOUSE >                              | Dynein heavy chain 3, axonemal < sp Q8BW94 DYH3_MOUSE >                             | Hemoglobin subunit alpha < sp P01942 HBA_MOUSE >                              | Homolog of human Werners syndrome protein < tr Q35948 Q35948_MOUSE >           |
| Histone H2B type 1-B < sp Q64475 H2B1B_MOUSE >                                | E3 ubiquitin-protein ligase UBR4 < sp A2AN08 UBR4_MOUSE >                           | Histone H2B type 1-B < sp Q64475 H2B1B_MOUSE >                                | Laminin subunit alpha-5 < sp Q61001 LAMA5_MOUSE >                              |
| Histone H2B type 1-F/J/L < sp P10853 H2B1F_MOUSE >                            | EGAM1 < tr Q3UL53 Q3UL53_MOUSE >                                                    | Histone H2B type 1-F/J/L < sp P10853 H2B1F_MOUSE >                            | Little elongation complex subunit 1 < sp E9Q286 ICE1_MOUSE >                   |
| Histone H2B type 1-P < sp Q8CGP2 H2B1P_MOUSE >                                | EGAM1N < tr B6ZND8 B6ZND8_MOUSE >                                                   | Histone H2B type 1-P < sp Q8CGP2 H2B1P_MOUSE >                                | MCG148116 < tr Q9D9Z8 Q9D9Z8_MOUSE >                                           |
| ATP synthase subunit alpha < tr D3Z6F5 D3Z6F5_MOUSE >                         | Fgd6 protein < tr B2RSV7 B2RSV7_MOUSE >                                             | ATP synthase subunit alpha < tr D3Z6F5 D3Z6F5_MOUSE >                         | Mitochondrial carnitine/acylcarnitine carrier protein < sp Q9Z2Z6 MCAT_MOUSE > |
| Histone H2A type 1 < sp P22752 H2A1_MOUSE >                                   | FYVE, RhoGEF and PH domain-containing protein 6 < sp Q69ZL1 FGD6_MOUSE >            | Histone H2A type 1 < sp P22752 H2A1_MOUSE >                                   | Mitochondrial ribosomal protein L3 < tr Q91XB2 Q91XB2_MOUSE >                  |
| Histone H2A type 1-F < sp Q8CGP5 H2A1F_MOUSE >                                | Heme-binding protein 1 < sp Q9R257 HEBP1_MOUSE >                                    | Histone H2A type 1-F < sp Q8CGP5 H2A1F_MOUSE >                                | Neuroguidin < sp Q9DB96 NGDN_MOUSE >                                           |
| Histone H2A type 1-H < sp Q8CGP6 H2A1H_MOUSE >                                | Heterogeneous nuclear ribonucleoprotein A1 < sp P49312 ROA1_MOUSE >                 | Histone H2A type 1-H < sp Q8CGP6 H2A1H_MOUSE >                                | Nuclear-interacting partner of ALK < sp Q80YV2 NIPA_MOUSE >                    |
| Histone H2A type 3 < sp Q8BFU2 H2A3_MOUSE >                                   | Hnrnpa112 protein < tr B7ZWG9 B7ZWG9_MOUSE >                                        | Histone H2A type 3 < sp Q8BFU2 H2A3_MOUSE >                                   | Nucleoside diphosphate kinase A < tr Q5NC79 Q5NC79_MOUSE >                     |
| 60S ribosomal protein L7 < sp P14148 RL7_MOUSE >                              | Homolog of human Werners syndrome protein < tr Q35948 Q35948_MOUSE >                | 60S ribosomal protein L7 < sp P14148 RL7_MOUSE >                              | Palmitoyl-protein thioesterase < tr Q8VBX5 Q8VBX5_MOUSE >                      |
| Aspartate aminotransferase, cytoplasmic < sp P05201 AATC_MOUSE >              | Laminin subunit alpha-5 < sp Q61001 LAMA5_MOUSE >                                   | Aspartate aminotransferase, cytoplasmic < sp P05201 AATC_MOUSE >              | Palmitoyl-protein thioesterase 1 < sp O88531 PPT1_MOUSE >                      |
| Argininosuccinate lyase < tr E0CXM2 E0CXM2_MOUSE >                            | Little elongation complex subunit 1 < sp E9Q286 ICE1_MOUSE >                        | Argininosuccinate lyase < tr E0CXM2 E0CXM2_MOUSE >                            | Parathyrimosin < sp Q9D0J8 PTMS_MOUSE >                                        |
| 60S ribosomal protein L35 < sp Q6ZVW7 RL35_MOUSE >                            | MCG148116 < tr Q9D9Z8 Q9D9Z8_MOUSE >                                                | 60S ribosomal protein L35 < sp Q6ZVW7 RL35_MOUSE >                            | Peroxisomal trans-2-enoyl-CoA reductase < sp Q99M27 PECR_MOUSE >               |
| Protein NipSnap homolog 1 < sp O55125 NIP51_MOUSE >                           | Mitochondrial carnitine/acylcarnitine carrier protein < sp Q9Z2Z6 MCAT_MOUSE >      | Protein NipSnap homolog 1 < sp O55125 NIP51_MOUSE >                           | Phospholipid-translocating ATPase < tr B9EJ52 B9EJ52_MOUSE >                   |
| Protein flightless-1 homolog < sp Q9JJ28 FLI1_MOUSE >                         | Mitochondrial ribosomal protein L3 < tr Q91XB2 Q91XB2_MOUSE >                       | Protein flightless-1 homolog < sp Q9JJ28 FLI1_MOUSE >                         | Probable phospholipid-transporting ATPase VD < sp Q8K2X1 AT10D_MOUSE >         |

|                                                                                                |                                                                                                                    |
|------------------------------------------------------------------------------------------------|--------------------------------------------------------------------------------------------------------------------|
| Aldehyde dehydrogenase X, mitochondrial < sp Q9CZS1 AL1B1_MOUSE >                              | Neuroguidin < sp Q9DB96 NGDN_MOUSE >                                                                               |
| Probable aminopeptidase NPEPL1 < sp Q6NSR8 PEPL1_MOUSE >                                       | Nuclear-interacting partner of ALK < sp Q80YV2 NIPA_MOUSE >                                                        |
| Protein FAM3B < sp Q9D309 FAM3B_MOUSE >                                                        | Nucleoside diphosphate kinase A < tr Q5NC79 Q5NC79_MOUSE >                                                         |
| L-serine dehydratase/L-threonine deaminase < sp Q8VBT2 SDHL_MOUSE >                            | Palmitoyl-protein thioesterase < tr Q8VBX5 Q8VBX5_MOUSE >                                                          |
| MCG22989, isoform CRA_a < tr G3UY29 G3UY29_MOUSE >                                             | Parathyrosin < sp Q9D0J8 PTMS_MOUSE >                                                                              |
| RAS oncogene family protein < tr A0A068BFR3 A0A068BFR3_MOUSE >                                 | Peroxisomal trans-2-enoyl-CoA reductase < sp Q99MZ7 PECR_MOUSE >                                                   |
| Ras-related protein Rab-11A < sp P62492 RB11A_MOUSE >                                          | Phospholipid-translocating ATPase < tr B9EJ52 B9EJ52_MOUSE >                                                       |
| Ras-related protein Rab-11B < sp P46638 RB11B_MOUSE >                                          | Probable phospholipid-transporting ATPase VD < sp Q8K2X1 AT10D_MOUSE >                                             |
| NADH dehydrogenase [ubiquinone] iron-sulfur protein 3, mitochondrial < sp Q9DCT2 INDU3_MOUSE > | Proteasome subunit beta type-5 < sp Q55234 PSB5_MOUSE >                                                            |
| Protein BC080695 < tr Q66JY9 Q66JY9_MOUSE >                                                    | Protein Crxos < tr V9GX9Y V9GX9Y_MOUSE >                                                                           |
| B-cell receptor-associated protein 31 < sp Q61335 BAP31_MOUSE >                                | Protein Styx11 < tr D3YZ02 D3YZ02_MOUSE >                                                                          |
| Acidic leucine-rich nuclear phosphoprotein 32 family member A < tr D3Z7M9 D3Z7M9_MOUSE >       | Protein Taf4a < tr E9QAP7 E9QAP7_MOUSE >                                                                           |
| Catechol O-methyltransferase < sp O88587 COMT_MOUSE >                                          | Protein Wdr72 < tr D3YYM4 D3YYM4_MOUSE >                                                                           |
| Very long-chain acyl-CoA synthetase < sp O35488 S27A2_MOUSE >                                  | Protein Zfp948 < tr Q6DFU8 Q6DFU8_MOUSE >                                                                          |
| Enoyl-CoA hydratase, mitochondrial < sp Q8BH95 ECHM_MOUSE >                                    | Ptms protein < tr Q66JR8 Q66JR8_MOUSE >                                                                            |
| Peroxisomal acyl-coenzyme A oxidase 2 < sp Q9QXD1 ACO2_MOUSE >                                 | Putative sodium-coupled neutral amino acid transporter 10 < sp Q5I012 S38AA_MOUSE >                                |
| Disintegrin and metalloproteinase domain-containing protein 32 < sp Q8K410 ADA32_MOUSE >       | Selection and upkeep of intraepithelial T-cells protein 5 < sp A7XUY5 SKIT5_MOUSE >                                |
| Protein Cngb1 < tr E1AZ71 E1AZ71_MOUSE >                                                       | Serine/threonine-protein kinase mTOR < sp Q9JLN9 MTOR_MOUSE >                                                      |
| Actin, cytoplasmic 1 < tr E9Q1F2 E9Q1F2_MOUSE >                                                | Solute carrier family 25 (Mitochondrial carnitine/acylcarnitine translocase), member 20 < tr Q7TPW6 Q7TPW6_MOUSE > |
| 60S ribosomal protein L21 < sp O09167 RL21_MOUSE >                                             | TBC1 domain family member 9 < sp Q3UYK3 TBCD9_MOUSE >                                                              |
| Ribosomal protein L21 < tr Q4VA28 Q4VA28_MOUSE >                                               | Transcription factor RFX3 < sp P48381 RFX3_MOUSE >                                                                 |
| Phenylalanine-4-hydroxylase < sp P16331 PH4H_MOUSE >                                           | V-set and transmembrane domain-containing protein 2A < sp Q8R0A6 VTM2A_MOUSE >                                     |
| Argininosuccinate lyase < sp Q91Y10 ARLY_MOUSE >                                               | Werner syndrome ATP-dependent helicase homolog < sp O09053 WRN_MOUSE >                                             |
| Histidine triad nucleotide-binding protein 1 < sp P70349 HINT1_MOUSE >                         | Aldo-keto reductase family 1, member C19 < tr G3X9Y6 G3X9Y6_MOUSE >                                                |
| Hydroxyacid oxidase 1 < sp Q9WU19 HAOX1_MOUSE >                                                | Chromodomain-helicase-DNA-binding protein 6 < sp A3KFM7 CHD6_MOUSE >                                               |
| 40S ribosomal protein S10 < sp P63325 RS10_MOUSE >                                             | Cysteine sulfinic acid decarboxylase < sp Q9DBE0 CSAD_MOUSE >                                                      |
| ATP synthase subunit gamma < tr A2AKU9 A2AKU9_MOUSE >                                          | E3 ubiquitin-protein ligase DTX1 < sp Q61010 DTX1_MOUSE >                                                          |
| ATP synthase subunit gamma, mitochondrial < sp Q91VR2 ATPG_MOUSE >                             | Hgd protein < tr Q05BJ1 Q05BJ1_MOUSE >                                                                             |
| Voltage-dependent anion-selective channel protein 1 < sp Q60932 VDAC1_MOUSE >                  | Histone-lysine N-methyltransferase < tr F8WI37 F8WI37_MOUSE >                                                      |
| Transaldolase < sp Q93092 TALDO_MOUSE >                                                        | Homogentisate 1, 2-dioxygenase < tr Q8CI38 Q8CI38_MOUSE >                                                          |
| Glutathione transferase class mu chain Yb2 (Fragments) < tr Q7M0F4 Q7M0F4_MOUSE >              | Laminin subunit alpha-3 < sp Q61789 LAMA3_MOUSE >                                                                  |
| Phosphatidylinositol 4-phosphate 5-kinase type-1 alpha < sp P70182 PI51A_MOUSE >               | NADPH--cytochrome P450 reductase < sp P37040 NCPR_MOUSE >                                                          |
| Vimentin < sp P20152 VIME_MOUSE >                                                              | Proteasome subunit beta type < tr D3YUM8 D3YUM8_MOUSE >                                                            |
| Gstm7 protein < tr Q6PJ91 Q6PJ91_MOUSE >                                                       | Protocadherin-8 < sp Q7TSK3 PCDH8_MOUSE >                                                                          |
| Serine protease inhibitor A3K < sp P07759 SPA3K_MOUSE >                                        | Ribosomal protein L5 < tr Q3TKR5 Q3TKR5_MOUSE >                                                                    |
| Histone H1.2 < sp P15864 H12_MOUSE >                                                           | S-formylglutathione hydrolase < sp Q9R0P3 ESTD_MOUSE >                                                             |
| Alad protein < tr Q8VCZ1 Q8VCZ1_MOUSE >                                                        | Tubulin beta-4A chain < sp Q9D6F9 TBB4A_MOUSE >                                                                    |

|                                                                                                                    |
|--------------------------------------------------------------------------------------------------------------------|
| Proteasome subunit beta type-5 < sp Q55234 PSB5_MOUSE >                                                            |
| Protein Crxos < tr V9GX9Y V9GX9Y_MOUSE >                                                                           |
| Protein Styx11 < tr D3YZ02 D3YZ02_MOUSE >                                                                          |
| Protein Taf4a < tr E9QAP7 E9QAP7_MOUSE >                                                                           |
| Protein Wdr72 < tr D3YYM4 D3YYM4_MOUSE >                                                                           |
| Protein Zfp948 < tr Q6DFU8 Q6DFU8_MOUSE >                                                                          |
| Protein Zfp955a < tr Q80XR7 Q80XR7_MOUSE >                                                                         |
| Protein Zfp955b < tr L7N232 L7N232_MOUSE >                                                                         |
| Ptms protein < tr Q66JR8 Q66JR8_MOUSE >                                                                            |
| Putative sodium-coupled neutral amino acid transporter 10 < sp Q5I012 S38AA_MOUSE >                                |
| Selection and upkeep of intraepithelial T-cells protein 5 < sp A7XUY5 SKIT5_MOUSE >                                |
| Serine/threonine-protein kinase mTOR < sp Q9JLN9 MTOR_MOUSE >                                                      |
| Solute carrier family 25 (Mitochondrial carnitine/acylcarnitine translocase), member 20 < tr Q7TPW6 Q7TPW6_MOUSE > |
| TBC1 domain family member 9 < sp Q3UYK3 TBCD9_MOUSE >                                                              |
| Transcription factor RFX3 < sp P48381 RFX3_MOUSE >                                                                 |
| V-set and transmembrane domain-containing protein 2A < sp Q8R0A6 VTM2A_MOUSE >                                     |
| Werner syndrome ATP-dependent helicase homolog < sp O09053 WRN_MOUSE >                                             |
| Aldo-keto reductase family 1, member C19 < tr G3X9Y6 G3X9Y6_MOUSE >                                                |
| Chromodomain-helicase-DNA-binding protein 6 < sp A3KFM7 CHD6_MOUSE >                                               |
| Cysteine sulfinic acid decarboxylase < sp Q9DBE0 CSAD_MOUSE >                                                      |
| E3 ubiquitin-protein ligase DTX1 < sp Q61010 DTX1_MOUSE >                                                          |
| Hgd protein < tr Q05BJ1 Q05BJ1_MOUSE >                                                                             |
| Histone-lysine N-methyltransferase < tr F8WI37 F8WI37_MOUSE >                                                      |
| Homogentisate 1, 2-dioxygenase < tr Q8CI38 Q8CI38_MOUSE >                                                          |
| Laminin subunit alpha-3 < sp Q61789 LAMA3_MOUSE >                                                                  |
| NADPH--cytochrome P450 reductase < sp P37040 NCPR_MOUSE >                                                          |
| Proteasome subunit beta type < tr D3YUM8 D3YUM8_MOUSE >                                                            |
| Protocadherin-8 < sp Q7TSK3 PCDH8_MOUSE >                                                                          |
| Ribosomal protein L5 < tr Q3TKR5 Q3TKR5_MOUSE >                                                                    |
| S-formylglutathione hydrolase < sp Q9R0P3 ESTD_MOUSE >                                                             |
| Tubulin beta-4A chain < sp Q9D6F9 TBB4A_MOUSE >                                                                    |
| Vesicle-associated membrane protein 1 < tr D3YTU0 D3YTU0_MOUSE >                                                   |
| IQ motif containing GTPase activating protein 2 < tr B9EKK3 B9EKK3_MOUSE >                                         |
| Peroxisomal reductase, mitochondrial < sp P99029 PRDX5_MOUSE >                                                     |
| Ras GTPase-activating-like protein IQGAP2 < sp Q3UQ44 IQGA2_MOUSE >                                                |
| Terminal uridylyltransferase 7 < sp Q5BLK4 TUT7_MOUSE >                                                            |
| Terminal uridylyltransferase 7 < tr E9PUA2 E9PUA2_MOUSE >                                                          |

|                                                                                     |                                                                                                    |
|-------------------------------------------------------------------------------------|----------------------------------------------------------------------------------------------------|
| Delta-aminolevulinic acid dehydratase < sp P10518 HEM2_MOUSE >                      | Vesicle-associated membrane protein 1 < tr D3YTU0 D3YTU0_MOUSE >                                   |
| Voltage-dependent anion-selective channel protein 2 < sp Q60930 VDAC2_MOUSE >       | IQ motif containing GTPase activating protein 2 < tr B9EKK3 B9EKK3_MOUSE >                         |
| Enolase < tr D3Z6E4 D3Z6E4_MOUSE >                                                  | Peroxisomal protein 5, mitochondrial < sp P99029 PRDX5_MOUSE >                                     |
| Gamma-enolase < sp P17183 ENOG_MOUSE >                                              | Ras GTPase-activating-like protein IQGAP2 < sp Q3UQ44 IQGA2_MOUSE >                                |
| E3 ubiquitin-protein ligase TRIM31 < sp Q8R0K2 TRI31_MOUSE >                        | Terminal uridylyltransferase 7 < sp Q5BLK4 TUT7_MOUSE >                                            |
| Cytochrome c oxidase subunit NDUF4 < sp Q62425 NDUA4_MOUSE >                        | Uncharacterized protein < tr V9GX38 V9GX38_MOUSE >                                                 |
| 40S ribosomal protein S13 < sp P62301 RS13_MOUSE >                                  | 4-aminobutyrate aminotransferase, mitochondrial < sp P61922 GABT_MOUSE >                           |
| Protein CREG1 < sp O88668 CREG1_MOUSE >                                             | Glycogen [starch] synthase, liver < sp Q8VCB3 GYS2_MOUSE >                                         |
| Cytochrome b-c1 complex subunit 8 < sp Q9CQ69 QCR8_MOUSE >                          | Ubiquitin-like modifier-activating enzyme 1 < sp Q02053 UBA1_MOUSE >                               |
| Carcinoembryonic antigen-related cell adhesion molecule 1 < sp P31809 CEAM1_MOUSE > | Fatty acid-binding protein, intestinal < sp P55050 FABPI_MOUSE >                                   |
| CEA-related cell adhesion molecule 1 < tr Q925P3 Q925P3_MOUSE >                     | ATPase, Na+/K+ transporting, alpha 3 polypeptide < tr Q8VCE0 Q8VCE0_MOUSE >                        |
| Uncharacterized protein < tr Q3LFS5 Q3LFS5_MOUSE >                                  | Inactive phospholipase C-like protein 1 < sp Q3USB7 PLCL1_MOUSE >                                  |
| Alpha-1-antitrypsin 1-1 < sp P07758 A1AT1_MOUSE >                                   | Probable 2-oxoglutarate dehydrogenase E1 component DHKTD1, mitochondrial < sp A2ATU0 DHTK1_MOUSE > |
| Alpha-1-antitrypsin 1-3 < sp Q00896 A1AT3_MOUSE >                                   | Sodium/potassium-transporting ATPase subunit alpha-3 < sp Q6PIC6 AT1A3_MOUSE >                     |
| Histone H2B < tr Q8CBB6 Q8CBB6_MOUSE >                                              | 17-beta-hydroxysteroid dehydrogenase type 6 < sp Q9R092 H17B6_MOUSE >                              |
| Histone H2B type 1-K < sp Q8CGP1 H2B1K_MOUSE >                                      | Protein Agl < tr F8VPN4 F8VPN4_MOUSE >                                                             |
| Peroxisomal bifunctional enzyme < sp Q9DBM2 ECHP_MOUSE >                            | Heat shock cognate 71 kDa protein < tr Q504P4 Q504P4_MOUSE >                                       |
| 60S ribosomal protein L26 < sp P61255 RL26_MOUSE >                                  | Rab15 protein < tr Q91YW0 Q91YW0_MOUSE >                                                           |
| ATP synthase subunit d, mitochondrial < sp Q9DCX2 ATP5H_MOUSE >                     | Ras-related protein Rab-15 < sp Q8K386 RAB15_MOUSE >                                               |
| MCG55033 < tr G3X9L6 G3X9L6_MOUSE >                                                 | UTP--glucose-1-phosphate uridylyltransferase < sp Q91ZJ5 UGPA_MOUSE >                              |
| Histone H2A < tr F8WIX8 F8WIX8_MOUSE >                                              | Protein Gm17430 < tr F6RSK3 F6RSK3_MOUSE >                                                         |
| Histone H2A type 2-A < sp Q6GSS7 H2A2A_MOUSE >                                      | EG627828 protein < tr B2RXM2 B2RXM2_MOUSE >                                                        |
| Epoxide hydrolase 2C < tr A8JYK8 A8JYK8_MOUSE >                                     | Heterogeneous nuclear ribonucleoprotein A3 < sp Q8BG05 ROA3_MOUSE >                                |
| Cytochrome b-c1 complex subunit 2, mitochondrial < sp Q9DB77 QCR2_MOUSE >           | Hnrpa3 protein < tr Q5U3M2 Q5U3M2_MOUSE >                                                          |
| 60S ribosomal protein L7a < sp P12970 RL7A_MOUSE >                                  | Uncharacterized protein < tr E9Q7H5 E9Q7H5_MOUSE >                                                 |
| Ribosomal protein L7A < tr Q5EBG5 Q5EBG5_MOUSE >                                    | Adenosylhomocysteinase < tr Q3U5U5 Q3U5U5_MOUSE >                                                  |
| Prohibitin-2 < sp Q35129 PHB2_MOUSE >                                               | Retinol dehydrogenase 7 < sp Q88451 RDH7_MOUSE >                                                   |
| Cytochrome b5 type B < sp Q9CQX2 CYB5B_MOUSE >                                      | 3-hydroxyacyl-CoA dehydrogenase type-2 < tr A2AFQ2 A2AFQ2_MOUSE >                                  |
| Malate dehydrogenase, cytoplasmic < sp P14152 MDHC_MOUSE >                          | Phenazine biosynthesis-like domain-containing protein 1 < sp Q9DCG6 PBLD1_MOUSE >                  |
| Histone H1.0 < sp P10922 H10_MOUSE >                                                | Phenazine biosynthesis-like domain-containing protein 2 < sp Q9CXN7 PBLD2_MOUSE >                  |
| 40S ribosomal protein S3 < sp P62908 RS3_MOUSE >                                    | Cytosolic 10-formyltetrahydrofolate dehydrogenase < sp Q8R0Y6 AL1L1_MOUSE >                        |
| Glutathione S-transferase Mu 1 < sp P10649 GSTM1_MOUSE >                            | 4-hydroxyphenylpyruvate dioxygenase < sp P49429 HPPD_MOUSE >                                       |
| 14-3-3 protein theta < sp P68254 1433T_MOUSE >                                      | D-dopachrome decarboxylase < sp Q35215 DOPD_MOUSE >                                                |
| Sodium/bile acid cotransporter < sp O08705 NTCP_MOUSE >                             | 60S ribosomal protein L27a < sp P14115 RL27A_MOUSE >                                               |
| Transcription factor BTF3 homolog 4 < sp Q9CQH7 BT3L4_MOUSE >                       | 4-hydroxy-2-oxoglutarate aldolase, mitochondrial < sp Q9DCU9 HOGA1_MOUSE >                         |
| Protein Acat3 < tr F2Z459 F2Z459_MOUSE >                                            | Destrin < sp Q9R0P5 DEST_MOUSE >                                                                   |
| Acetyl CoA transferase-like protein < tr Q8R4V3 Q8R4V3_MOUSE >                      | Ribosomal protein L14 < tr Q569Z0 Q569Z0_MOUSE >                                                   |

|                                                                                                    |
|----------------------------------------------------------------------------------------------------|
| Uncharacterized protein < tr V9GX38 V9GX38_MOUSE >                                                 |
| 4-aminobutyrate aminotransferase, mitochondrial < sp P61922 GABT_MOUSE >                           |
| Glycogen [starch] synthase, liver < sp Q8VCB3 GYS2_MOUSE >                                         |
| Ubiquitin-like modifier-activating enzyme 1 < sp Q02053 UBA1_MOUSE >                               |
| Fatty acid-binding protein, intestinal < sp P55050 FABPI_MOUSE >                                   |
| ATPase, Na+/K+ transporting, alpha 3 polypeptide < tr Q8VCE0 Q8VCE0_MOUSE >                        |
| Inactive phospholipase C-like protein 1 < sp Q3USB7 PLCL1_MOUSE >                                  |
| Probable 2-oxoglutarate dehydrogenase E1 component DHKTD1, mitochondrial < sp A2ATU0 DHTK1_MOUSE > |
| Sodium/potassium-transporting ATPase subunit alpha-3 < sp Q6PIC6 AT1A3_MOUSE >                     |
| 17-beta-hydroxysteroid dehydrogenase type 6 < sp Q9R092 H17B6_MOUSE >                              |
| Protein Agl < tr F8VPN4 F8VPN4_MOUSE >                                                             |
| Heat shock cognate 71 kDa protein < tr Q504P4 Q504P4_MOUSE >                                       |
| Glutathione S-transferase A2 < sp P10648 GSTA2_MOUSE >                                             |
| 60S ribosomal protein L23 < sp P62830 RL23_MOUSE >                                                 |
| Long-chain-fatty-acid--CoA ligase 1 < sp P41216 ACSL1_MOUSE >                                      |
| Mitochondrial 10-formyltetrahydrofolate dehydrogenase < sp Q8K009 AL1L2_MOUSE >                    |
| Cytochrome P450 2C54 < sp Q6XVG2 CP254_MOUSE >                                                     |
| Isochorismatase domain-containing protein 2A, mitochondrial < sp P85094 ISC2A_MOUSE >              |
| D-beta-hydroxybutyrate dehydrogenase, mitochondrial < sp Q80XN0 BDH_MOUSE >                        |
| Claithrin heavy chain < tr Q5SXR6 Q5SXR6_MOUSE >                                                   |
| Vigilin < sp Q8VDJ3 VIGLN_MOUSE >                                                                  |

|                                                                                                |                                                                                                   |
|------------------------------------------------------------------------------------------------|---------------------------------------------------------------------------------------------------|
| NADH dehydrogenase (Ubiquinone) Fe-S protein 8 < tr Q8VC72 Q8VC72_MOUSE >                      | SEC14-like protein 4 < sp Q8R0F9 S14L4_MOUSE >                                                    |
| NADH dehydrogenase [ubiquinone] iron-sulfur protein 8, mitochondrial < sp Q8K3J1 NDUS8_MOUSE > | Carboxylesterase 3B < sp Q8VCU1 EST3B_MOUSE >                                                     |
| Transmembrane emp24 domain-containing protein 9 < sp Q99KF1 TMED9_MOUSE >                      | OBOX3 < tr Q8VHG6 Q8VHG6_MOUSE >                                                                  |
| Diaphanous homolog 3 (Drosophila) < tr Q0VGT1 Q0VGT1_MOUSE >                                   | Alpha-2-macroglobulin < sp Q61838 A2M_MOUSE >                                                     |
| Protein diaphanous homolog 3 < sp Q9Z207 DIAP3_MOUSE >                                         | Crystallin, zeta < tr Q80XR3 Q80XR3_MOUSE >                                                       |
| Ephx1 protein < tr Q6PEV0 Q6PEV0_MOUSE >                                                       | Quinone oxidoreductase < sp P47199 QOR_MOUSE >                                                    |
| 40S ribosomal protein S11 < sp P62281 RS11_MOUSE >                                             | 4921524L21Rik protein < tr Q80W38 Q80W38_MOUSE >                                                  |
| Protein Mup13 < tr L7N222 L7N222_MOUSE >                                                       | MCG15536 < tr Q9D5T2 Q9D5T2_MOUSE >                                                               |
|                                                                                                | Glutathione S-transferase theta-1 < tr D3Z3X5 D3Z3X5_MOUSE >                                      |
|                                                                                                | Pyrethroid hydrolase Ces2e < sp Q8BK48 EST2E_MOUSE >                                              |
|                                                                                                | Guanine nucleotide-binding protein subunit beta-2-like 1 < sp P68040 GBLP_MOUSE >                 |
|                                                                                                | Pyruvate kinase < tr A7MCU9 A7MCU9_MOUSE >                                                        |
|                                                                                                | Pyruvate kinase PKLR < sp P53657 KPYR_MOUSE >                                                     |
|                                                                                                | PCTP-like protein < sp Q9JMD3 PCTL_MOUSE >                                                        |
|                                                                                                | Aldose 1-epimerase < sp Q8K157 GALM_MOUSE >                                                       |
|                                                                                                | 10-formyltetrahydrofolate dehydrogenase < tr Q8CIF2 Q8CIF2_MOUSE >                                |
|                                                                                                | Succinate dehydrogenase [ubiquinone] flavoprotein subunit, mitochondrial < sp Q8K2B3 SDHA_MOUSE > |
|                                                                                                | MCG115977 < tr G3UWG1 G3UWG1_MOUSE >                                                              |
|                                                                                                | Lactoylglutathione lyase < sp Q9CPU0 LGUL_MOUSE >                                                 |
|                                                                                                | Glutamine synthetase < sp P15105 GLNA_MOUSE >                                                     |
|                                                                                                | ARL14 effector protein < sp Q8BIX3 AL14E_MOUSE >                                                  |
|                                                                                                | Glutaryl-CoA dehydrogenase, mitochondrial < sp Q60759 GCDH_MOUSE >                                |
|                                                                                                | Aldo-keto reductase family 1 member C13 < sp Q8VC28 AK1CD_MOUSE >                                 |
|                                                                                                | Dihydrodiol dehydrogenase < tr Q54A37 Q54A37_MOUSE >                                              |
|                                                                                                | Protein Cyp2d34 < tr L7N463 L7N463_MOUSE >                                                        |
|                                                                                                | Protein NDRG2 < sp Q9QYG0 NDRG2_MOUSE >                                                           |
|                                                                                                | Sulfite oxidase, mitochondrial < sp Q8R086 SUOX_MOUSE >                                           |
|                                                                                                | 4933430117Rik protein < tr Q14AX1 Q14AX1_MOUSE >                                                  |
|                                                                                                | Aldehyde dehydrogenase < tr Q8C5J1 Q8C5J1_MOUSE >                                                 |
|                                                                                                | Dimethylarginine dimethylaminohydrolase 1, isoform CRA_a < tr D3YU15 D3YU15_MOUSE >               |
|                                                                                                | Signal sequence receptor, delta < tr Q9D8L3 Q9D8L3_MOUSE >                                        |
|                                                                                                | Sphingosine 1-phosphate receptor 3 < sp Q9Z0U9 S1PR3_MOUSE >                                      |
|                                                                                                | Translocon-associated protein subunit delta < sp Q62186 SSRD_MOUSE >                              |
|                                                                                                | Catalase < sp P24270 CATA_MOUSE >                                                                 |
|                                                                                                | Protein 201011101Rik < tr F8WGB2 F8WGB2_MOUSE >                                                   |
|                                                                                                | 2-hydroxyacyl-CoA lyase 1 < sp Q9QXE0 HACL1_MOUSE >                                               |
|                                                                                                | Adenosine kinase < sp P55264 ADK_MOUSE >                                                          |

|                                                                              |
|------------------------------------------------------------------------------|
| Tubulin beta-2B chain <<br>sp Q9CWF2 TBB2B_MOUSE >                           |
| Protein phosphatase 1D <<br>sp Q9QZ67 PPM1D_MOUSE >                          |
| GTP cyclohydrolase 1 feedback regulatory protein<br>< sp P99025 GFRP_MOUSE > |
| Histidine ammonia-lyase <<br>sp P35492 HUTH_MOUSE >                          |
| Xin actin-binding repeat-containing protein 2 <<br>sp Q4U4S6 XIRP2_MOUSE >   |
| Complement C3 < sp P01027 CO3_MOUSE >                                        |
| Pyrethroid hydrolase Ces2a <<br>sp Q8QZR3 EST2A_MOUSE >                      |
| Glutathione S-transferase theta 3 <<br>tr Q99L20 Q99L20_MOUSE >              |
| Isobutyryl-CoA dehydrogenase, mitochondrial <<br>sp Q9D7B6 ACAD8_MOUSE >     |
| Acyl-coenzyme A synthetase ACSM1,<br>mitochondrial < sp Q91VA0 ACSM1_MOUSE > |
| Aldo-keto reductase family 1 member C21 <<br>sp Q91WR5 AK1CL_MOUSE >         |
| Fibrinogen gamma chain <<br>sp Q8VCM7 FIBG_MOUSE >                           |
| Leucine-rich repeat-containing protein 59 <<br>sp Q922Q8 LRC59_MOUSE >       |
| 40S ribosomal protein S18 <<br>tr S4R1N6 S4R1N6_MOUSE >                      |
| 60S ribosomal protein L27 <<br>sp P61358 RL27_MOUSE >                        |
| Tubulin beta-5 chain < sp P99024 TBB5_MOUSE >                                |
| Protein A730017C20Rik <<br>tr E9Q5J6 E9Q5J6_MOUSE >                          |
| Rpl37a protein < tr Q5M9N6 Q5M9N6_MOUSE >                                    |
| UPF0258 protein KIAA1024-like homolog <<br>sp Q8C4X7 K102L_MOUSE >           |
| Homeobox protein Nkx-2.1 <<br>sp P50220 NKX21_MOUSE >                        |
| NK2 homeobox 1 < tr Q6PFE0 Q6PFE0_MOUSE >                                    |
| Alpha-1,4 glucan phosphorylase <<br>tr Q3TJQ7 Q3TJQ7_MOUSE >                 |
