# Supplementary material for: The Role of Promyelocytic Leukemia Protein in Steatosis-Associated Hepatic Tumors Related to Chronic Hepatitis B virus Infection
Source: PubMed Central journal article supplement — Transl Oncol. 2018 Apr 24;11(3):743–54. doi: 10.1016/j.tranon.2018.03.013 (PMC6050444; doi:10.1016/j.tranon.2018.03.013), 2018-04-24
Supplement: mmc2.pdf [file mmc2.pdf]

**Table S2.** The commonly altered genes in the pathways of energy metabolism and its regulation in 6-month-old *PML*<sup>-/-</sup>, *HBsAg*<sup>tg/0</sup> and *PML*<sup>-/-</sup>*HBsAg*<sup>tg/0</sup> male mice.

| <b>Oxidative phosphorylation</b>                                                                                     | <b>Glycolysis and gluconeogenesis</b>           | <b>Fatty acid metabolism</b>                                  | <b>Tricarboxylic acid cycle</b>                                                                                  |
|----------------------------------------------------------------------------------------------------------------------|-------------------------------------------------|---------------------------------------------------------------|------------------------------------------------------------------------------------------------------------------|
| <b>ATP synthases</b> (Atp5a1, Atp5b, Atp5c1, Atp5f1, Atp5h and Atp5j2)                                               | <b>Fructose-bisphosphate aldolase A</b> (Aldoa) | <b>Acetyl-CoA acyltransferases</b> (Hadha and Hadhb)          | <b>Citrate synthase</b> (Cs)                                                                                     |
| <b>Cytochrome c oxidases</b> (COX2, Cox5a, Cox5b and Cox4i1)                                                         | <b>Enolases</b> (Eno2 and Eno3)                 | <b>Mitochondrial enoyl-CoA hydratase</b> (Echs1)              | <b>Fumarate hydratase 1</b> (Fh1)                                                                                |
| <b>NADH dehydrogenases (ubiquinone)</b> (Ndufa4, Ndufa9, Ndufb2, Ndufb4, Ndufb11, Ndufs1, Ndufs3, Ndufs7 and Ndufs8) | <b>Phosphoglycerate mutase 1</b> (Pgam1)        | <b>Peroxisomal acyl-coenzyme A oxidases</b> (Acox1 and Acox2) | <b>Isocitrate dehydrogenase 2</b> (Idh2)                                                                         |
| <b>Ubiquinol cytochrome c reductases</b> (Uqcrc2, Uqcrh and Uqcrcq)                                                  | <b>Cytoplasmic malate dehydrogenase</b> (Mdh1)  | <b>Enoyl-CoA hydratase</b> (Ehhadh)                           | <b>Dihydrolipoyllysine-residue succinyltransferase component of 2-oxoglutarate dehydrogenase complex</b> (Dl1st) |
|                                                                                                                      | <b>Fructose-1,6-bisphosphatase 1</b> (Fbp1)     | <b>Very long-chain acyl-CoA synthetase</b> (Slc27a2)          | <b>Succinate-Coenzyme A ligase, GDP-forming beta subunit</b> (Suclg2)                                            |
