# Supplementary material for: The Role of Promyelocytic Leukemia Protein in Steatosis-Associated Hepatic Tumors Related to Chronic Hepatitis B virus Infection
Source: PubMed Central journal article supplement — Transl Oncol. 2018 Apr 24;11(3):743–54. doi: 10.1016/j.tranon.2018.03.013 (PMC6050444; doi:10.1016/j.tranon.2018.03.013), 2018-04-24
Supplement: mmc3.pdf [file mmc3.pdf]

**Table S3.** The protein lists of common and divergent alterations in liver proteomics between 7-month-old and 11-month-old *PML<sup>-/-</sup> HbsAg<sup>tg/0</sup>* male mice toward severe lipodystrophy and hepatocarcinogenesis.

| Common alterations                                                                             | Divergent alterations                                                                  |
|------------------------------------------------------------------------------------------------|----------------------------------------------------------------------------------------|
| Protein List                                                                                   | Protein List                                                                           |
| Pre-mRNA-processing-splicing factor 8 < sp Q99PV0 PRP8_MOUSE >                                 | Ubiquinone biosynthesis protein COQ9, mitochondrial < sp Q8K1Z0 COQ9_MOUSE >           |
| Proteasome subunit alpha type-2 < sp P49722 PSA2_MOUSE >                                       | Dystonin < sp Q91ZU6 DYST_MOUSE >                                                      |
| Beta-enolase < sp P21550 ENOB_MOUSE >                                                          | Beta-taxilin < sp Q8VBT1 TXLNB_MOUSE >                                                 |
| Eno3 protein < tr Q4FK59 Q4FK59_MOUSE >                                                        | Dystonin < tr A0A087WSP0 A0A087WSP0_MOUSE >                                            |
| MCG10343, isoform CRA_b < tr G5E902 G5E902_MOUSE >                                             | Inorganic pyrophosphatase < sp Q9D819 IPYR_MOUSE >                                     |
| Phosphate carrier protein, mitochondrial < sp Q8VEM8 MPCP_MOUSE >                              | Tropomyosin 1, alpha, isoform CRA_k < tr G5E8R2 G5E8R2_MOUSE >                         |
| Cytochrome b-c1 complex subunit 6, mitochondrial < sp P99028 QCR6_MOUSE >                      | NADH-ubiquinone oxidoreductase 75 kDa subunit, mitochondrial < sp Q91VD9 NDUS1_MOUSE > |
| Transmembrane emp24 domain-containing protein 4 < sp Q8R1V4 TMED4_MOUSE >                      | Telomerase-binding protein EST1A < sp P61406 EST1A_MOUSE >                             |
| Epoxyde hydrolase 1 < sp Q9D379 HYEP_MOUSE >                                                   | Trifunctional enzyme subunit beta, mitochondrial < sp Q99JY0 ECHB_MOUSE >              |
| Protein Ugt2b34 < tr Q8K154 Q8K154_MOUSE >                                                     | Hemoglobin beta chain subunit < tr B1Q450 B1Q450_MOUSE >                               |
| Phosphoglucomutase 2 < tr Q5RJV4 Q5RJV4_MOUSE >                                                | Heat shock cognate 71 kDa protein < sp P63017 HSP7C_MOUSE >                            |
| 14-3-3 protein zeta/delta < sp P63101 1433Z_MOUSE >                                            | Proteasome subunit beta type-1 < sp O09061 PSB1_MOUSE >                                |
| MCG1788 < tr Q3UEP4 Q3UEP4_MOUSE >                                                             | Carnitine O-acetyltransferase < sp P47934 CACP_MOUSE >                                 |
| CDGSH iron-sulfur domain-containing protein 1 < sp Q91WS0 CISD1_MOUSE >                        | Centromere protein V < sp Q9CXS4 CENPV_MOUSE >                                         |
| Glutathione S-transferase A4 < sp P24472 GSTA4_MOUSE >                                         | Aldehyde dehydrogenase < tr B1ATI0 B1ATI0_MOUSE >                                      |
| Glutathione S-transferase Mu 3 < sp P19639 GSTM4_MOUSE >                                       | Fatty aldehyde dehydrogenase < sp P47740 AL3A2_MOUSE >                                 |
| ATP synthase F(0) complex subunit B1, mitochondrial < sp Q9CQQ7 AT5F1_MOUSE >                  | Cytochrome c oxidase subunit 5A, mitochondrial < sp P12787 COX5A_MOUSE >               |
| Ornithine aminotransferase, mitochondrial < sp P29758 OAT_MOUSE >                              | Nucleoside diphosphate kinase A < sp P15532 NDKA_MOUSE >                               |
| 60S ribosomal protein L23a < sp P62751 RL23A_MOUSE >                                           | Histone H2A type 1-K < sp Q8CGP7 H2A1K_MOUSE >                                         |
| Alpha-1-antitrypsin 1-2 < sp P22599 A1AT2_MOUSE >                                              | Myosin-9 < sp Q8VDD5 MYH9_MOUSE >                                                      |
| Hemoglobin subunit alpha < sp P01942 HBA_MOUSE >                                               | Histone H2B type 2-E < sp Q64524 H2B2E_MOUSE >                                         |
| Histidine triad nucleotide-binding protein 1 < sp P70349 HINT1_MOUSE >                         | Histone H2B type 3-A < sp Q9D2U9 H2B3A_MOUSE >                                         |
| Hydroxyacid oxidase 1 < sp Q9WU19 HAOX1_MOUSE >                                                | Histone H2B type 3-B < sp Q8CGP0 H2B3B_MOUSE >                                         |
| 40S ribosomal protein S10 < sp P63325 RS10_MOUSE >                                             | Histone H2B type 2-B < tr G3X9D5 G3X9D5_MOUSE >                                        |
| ATP synthase subunit gamma < tr A2AKU9 A2AKU9_MOUSE >                                          | 60S ribosomal protein L36a < sp P83882 RL36A_MOUSE >                                   |
| Voltage-dependent anion-selective channel protein 1 < sp Q60932 VDAC1_MOUSE >                  | MCG18090 < tr A0A0A6YW33 A0A0A6YW33_MOUSE >                                            |
| Transaldolase < sp Q93092 TALDO_MOUSE >                                                        | Solute carrier organic anion transporter family member 1B2 < sp Q9JL3 SO1B2_MOUSE >    |
| Glutathione transferase class mu chain Yb2 (Fragments) < tr Q7M0F4 Q7M0F4_MOUSE >              | 40S ribosomal protein S17 < sp P63276 RS17_MOUSE >                                     |
| Phosphatidylinositol 4-phosphate 5-kinase type-1 alpha < sp P70182 PI51A_MOUSE >               | Carbonic anhydrase 2 < sp P00920 CAH2_MOUSE >                                          |
| Vimentin < sp P20152 VIME_MOUSE >                                                              | 40S ribosomal protein S2 < sp P25444 RS2_MOUSE >                                       |
| Gstm7 protein < tr Q6PJ91 Q6PJ91_MOUSE >                                                       | Uncharacterized protein < tr F6YTZ4 F6YTZ4_MOUSE >                                     |
| Serine protease inhibitor A3K < sp P07759 SPA3K_MOUSE >                                        | Pro-cathepsin H < sp P49935 CATH_MOUSE >                                               |
| Histone H1.2 < sp P15864 H12_MOUSE >                                                           | Beta-globin < tr A8DUP3 A8DUP3_MOUSE >                                                 |
| 14-3-3 protein theta < sp P68254 1433T_MOUSE >                                                 | 60S ribosomal protein L37a < sp P61514 RL37A_MOUSE >                                   |
| Sodium/bile acid cotransporter < sp O08705 NTCP_MOUSE >                                        | Putative uncharacterized protein < tr Q8BPF4 Q8BPF4_MOUSE >                            |
| Transcription factor BTF3 homolog 4 < sp Q9CQH7 BT3L4_MOUSE >                                  | Histone H1.1 < sp P43275 H11_MOUSE >                                                   |
| Protein Acat3 < tr F2Z459 F2Z459_MOUSE >                                                       | 60S ribosomal protein L32 < sp P62911 RL32_MOUSE >                                     |
| Acetyl CoA transferase-like protein < tr Q8R4V3 Q8R4V3_MOUSE >                                 | Ribosomal protein L32 < tr Q5PR09 Q5PR09_MOUSE >                                       |
| NADH dehydrogenase (Ubiquinone) Fe-S protein 8 < tr Q8VC72 Q8VC72_MOUSE >                      | Adrenodoxin, mitochondrial < sp P46656 ADX_MOUSE >                                     |
| NADH dehydrogenase [ubiquinone] iron-sulfur protein 8, mitochondrial < sp Q8K3J1 NDUS8_MOUSE > | 40S ribosomal protein S3a < tr Q3JUJ5 Q3JUJ5_MOUSE >                                   |
| Transmembrane emp24 domain-containing protein 9 < sp Q99KF1 TMED9_MOUSE >                      | Microsomal glutathione S-transferase 1 < sp Q91VS7 MGST1_MOUSE >                       |
| Diaphanous homolog 3 (Drosophila) < tr Q0VGT1 Q0VGT1_MOUSE >                                   | Hepatoma-derived growth factor < sp P51859 HDGF_MOUSE >                                |
| Protein diaphanous homolog 3 < sp Q9Z207 DIAP3_MOUSE >                                         | Dipeptidyl peptidase 4 < sp P28843 DPP4_MOUSE >                                        |
| Ephx1 protein < tr Q6PEV0 Q6PEV0_MOUSE >                                                       | MYB-1b < tr Q60951 Q60951_MOUSE >                                                      |
| 40S ribosomal protein S11 < sp P62281 RS11_MOUSE >                                             | Nuclease-sensitive element-binding protein 1 < sp P62960 YBOX1_MOUSE >                 |
| Protein Mup13 < tr L7N222 L7N222_MOUSE >                                                       | Y box protein 1 < tr Q810K5 Q810K5_MOUSE >                                             |
| Chaperone activity of bc1 complex-like, mitochondrial < sp Q60936 ADCK3_MOUSE >                |                                                                                        |

|                                                                                                        |
|--------------------------------------------------------------------------------------------------------|
| Transcriptional activator protein Pur-alpha < sp P42669 PURA_MOUSE >                                   |
| 60S ribosomal protein L10a < sp P53026 RL10A_MOUSE >                                                   |
| Cofilin-1 < sp P18760 COF1_MOUSE >                                                                     |
| Protein Ccdc170 < tr D3YXL0 D3YXL0_MOUSE >                                                             |
| Coatamer subunit beta' < sp O55029 COPB2_MOUSE >                                                       |
| Kinesin-like protein < tr E9QMU1 E9QMU1_MOUSE >                                                        |
| Kinesin-like protein KIF7 < sp B7ZNG0 KIF7_MOUSE >                                                     |
| LIM and SH3 domain protein 1 < sp Q61792 LASP1_MOUSE >                                                 |
| MCG67952 < tr J3QK04 J3QK04_MOUSE >                                                                    |
| Microtubule-actin cross-linking factor 1 < tr B1ARU1 B1ARU1_MOUSE >                                    |
| Epoxide hydrolase 1, microsomal < tr Q8K2W5 Q8K2W5_MOUSE >                                             |
| Mannose-binding protein C < sp P41317 MBL2_MOUSE >                                                     |
| 60S ribosomal protein L13a < sp P19253 RL13A_MOUSE >                                                   |
| ATP synthase subunit f, mitochondrial < sp P56135 ATPK_MOUSE >                                         |
| Serine protease inhibitor A3N < sp Q91WP6 SPA3N_MOUSE >                                                |
| Serpina3h protein < tr A2RTV1 A2RTV1_MOUSE >                                                           |
| Serine (Or cysteine) peptidase inhibitor, clade A, member 3N, isoform CRA_a < tr G3X8T9 G3X8T9_MOUSE > |
| Aminopeptidase N < sp P97449 AMPN_MOUSE >                                                              |
| Alpha-1-antitrypsin 1-4 < sp Q00897 A1AT4_MOUSE >                                                      |
| 60S ribosomal protein L35 < sp Q6ZVW7 RL35_MOUSE >                                                     |
| Histone H2A type 1 < sp P22752 H2A1_MOUSE >                                                            |
| Histone H2A type 1-F < sp Q8CGP5 H2A1F_MOUSE >                                                         |
| Histone H2A type 1-H < sp Q8CGP6 H2A1H_MOUSE >                                                         |
| Histone H2A type 3 < sp Q8BFU2 H2A3_MOUSE >                                                            |
| Heterogeneous nuclear ribonucleoprotein A/B < sp Q99020 ROAA_MOUSE >                                   |
| Heterogeneous nuclear ribonucleoprotein A/B, isoform CRA_b < tr Q9D6G1 Q9D6G1_MOUSE >                  |
| 60S ribosomal protein L7 < sp P14148 RL7_MOUSE >                                                       |
| Cytochrome b5 type B < sp Q9CQX2 CYB5B_MOUSE >                                                         |
| Aspartate aminotransferase, cytoplasmic < sp P05201 AATC_MOUSE >                                       |
| ATP synthase subunit alpha < tr D3Z6F5 D3Z6F5_MOUSE >                                                  |
| Cytochrome b-c1 complex subunit 2, mitochondrial < sp Q9DB77 QCR2_MOUSE >                              |
| Protein NipSnap homolog 1 < sp O55125 NIPS1_MOUSE >                                                    |
| Protein flightless-1 homolog < sp Q9JJ28 FLII_MOUSE >                                                  |
| Argininosuccinate lyase < tr E0CXM2 E0CXM2_MOUSE >                                                     |
| 60S ribosomal protein L7a < sp P12970 RL7A_MOUSE >                                                     |
| Ribosomal protein L7A < tr Q5EBG5 Q5EBG5_MOUSE >                                                       |
| Glutathione S-transferase kappa 1 < sp Q9DCM2 GSTK1_MOUSE >                                            |
| Histone H2B type 1-B < sp Q64475 H2B1B_MOUSE >                                                         |
| Histone H2B type 1-F/J/L < sp P10853 H2B1F_MOUSE >                                                     |
| Histone H2B type 1-P < sp Q8CGP2 H2B1P_MOUSE >                                                         |
| Histone H2B < tr Q8CBB6 Q8CBB6_MOUSE >                                                                 |
| Histone H2B type 1-K < sp Q8CGP1 H2B1K_MOUSE >                                                         |
| Hist2h2bb protein < tr Q8VEE3 Q8VEE3_MOUSE >                                                           |
| Phenazine biosynthesis-like domain-containing protein 1 < sp Q9DCG6 PBLD1_MOUSE >                      |
| Catalase < sp P24270 CATA_MOUSE >                                                                      |
| Cytosolic 10-formyltetrahydrofolate dehydrogenase < sp Q8R0Y6 AL1L1_MOUSE >                            |
| 10-formyltetrahydrofolate dehydrogenase < tr Q8CIF2 Q8CIF2_MOUSE >                                     |
| EG627828 protein < tr B2RXM2 B2RXM2_MOUSE >                                                            |
| Heterogeneous nuclear ribonucleoprotein A3 < sp Q8BG05 ROA3_MOUSE >                                    |
| Hnrpa3 protein < tr Q5U3M2 Q5U3M2_MOUSE >                                                              |
| Hnrpa3 protein < tr Q6P617 Q6P617_MOUSE >                                                              |

|                                                                                                   |
|---------------------------------------------------------------------------------------------------|
| Uncharacterized protein < tr E9Q7H5 E9Q7H5_MOUSE >                                                |
| Alcohol dehydrogenase class-3 < sp P28474 ADHX_MOUSE >                                            |
| Adenosylhomocysteinase < tr Q3U5U5 Q3U5U5_MOUSE >                                                 |
| Long-chain-fatty-acid--CoA ligase 1 < sp P41216 ACSL1_MOUSE >                                     |
| D-dopachrome decarboxylase < sp O35215 DOPD_MOUSE >                                               |
| Lactoylglutathione lyase < sp Q9CPU0 LGUL_MOUSE >                                                 |
| Clathrin heavy chain < tr Q5SXR6 Q5SXR6_MOUSE >                                                   |
| Clathrin heavy chain 1 < sp Q68FD5 CLH1_MOUSE >                                                   |
| 4-hydroxyphenylpyruvate dioxygenase < sp P49429 HPPD_MOUSE >                                      |
| Carboxylesterase 1D < sp Q8VCT4 CES1D_MOUSE >                                                     |
| Glutathione S-transferase A2 < sp P10648 GSTA2_MOUSE >                                            |
| 3-hydroxyacyl-CoA dehydrogenase type-2 < tr A2AFQ2 A2AFQ2_MOUSE >                                 |
| Expressed sequence AU018778 < tr Q91WU0 Q91WU0_MOUSE >                                            |
| Phenazine biosynthesis-like domain-containing protein 2 < sp Q9CXN7 PBLD2_MOUSE >                 |
| D-beta-hydroxybutyrate dehydrogenase, mitochondrial < sp Q80XN0 BDH_MOUSE >                       |
| Succinate dehydrogenase [ubiquinone] flavoprotein subunit, mitochondrial < sp Q8K2B3 SDHA_MOUSE > |
| Vigilin < sp Q8VDJ3 VIGLN_MOUSE >                                                                 |
| Ataxin-10 < sp P28658 ATX10_MOUSE >                                                               |
| Rab15 protein < tr Q91YW0 Q91YW0_MOUSE >                                                          |
| Ras-related protein Rab-15 < sp Q8K386 RAB15_MOUSE >                                              |
| Ras-related protein Rab-33B < sp O35963 RB33B_MOUSE >                                             |
| UTP--glucose-1-phosphate uridylyltransferase < sp Q91ZJ5 UGPA_MOUSE >                             |
| GTP-binding nuclear protein Ran < sp P62827 RAN_MOUSE >                                           |
| Pigl protein < tr Q4V9U8 Q4V9U8_MOUSE >                                                           |
| Ras-related protein Rab-6B < sp P61294 RAB6B_MOUSE >                                              |
| Dihydrofolate reductase < sp P00375 DYS_MOUSE >                                                   |
| Ras-related protein Rab-1A < sp P62821 RAB1A_MOUSE >                                              |
| Carboxylesterase 1E < sp Q64176 EST1E_MOUSE >                                                     |
| ATP synthase subunit delta, mitochondrial < sp Q9D3D9 ATPD_MOUSE >                                |
| 40S ribosomal protein S15 < sp P62843 RS15_MOUSE >                                                |
| Protein Gm17430 < tr F6RSK3 F6RSK3_MOUSE >                                                        |
| Retinol dehydrogenase 7 < sp O88451 RDH7_MOUSE >                                                  |
| Cystathionine beta-synthase < sp Q91WT9 CBS_MOUSE >                                               |
| ARL14 effector protein < sp Q8BIX3 AL14E_MOUSE >                                                  |
| Glutaryl-CoA dehydrogenase, mitochondrial < sp Q60759 GCDH_MOUSE >                                |
| Aldo-keto reductase family 1 member C13 < sp Q8VC28 AK1CD_MOUSE >                                 |
| Dihydrodiol dehydrogenase < tr Q54A37 Q54A37_MOUSE >                                              |
| Protein Cyp2d34 < tr L7N463 L7N463_MOUSE >                                                        |
| Protein NDRG2 < sp Q9QYG0 NDRG2_MOUSE >                                                           |
| Sulfite oxidase, mitochondrial < sp Q8R086 SUOX_MOUSE >                                           |
| 4933430I17Rik protein < tr Q14AX1 Q14AX1_MOUSE >                                                  |
| Aldehyde dehydrogenase < tr Q8C5J1 Q8C5J1_MOUSE >                                                 |
| Dimethylarginine dimethylaminohydrolase 1, isoform CRA_a < tr D3YU15 D3YU15_MOUSE >               |
| Signal sequence receptor, delta < tr Q9D8L3 Q9D8L3_MOUSE >                                        |
| Sphingosine 1-phosphate receptor 3 < sp Q9Z0U9 S1PR3_MOUSE >                                      |
| Translocon-associated protein subunit delta < sp Q62186 SSRD_MOUSE >                              |
| Protein 201011101Rik < tr F8WGB2 F8WGB2_MOUSE >                                                   |
| 2-hydroxyacyl-CoA lyase 1 < sp Q9QXE0 HACL1_MOUSE >                                               |
| Adenosine kinase < sp P55264 ADK_MOUSE >                                                          |
| Tubulin beta-2B chain < sp Q9CWF2 TBB2B_MOUSE >                                                   |
| Protein phosphatase 1D < sp Q9QZ67 PPM1D_MOUSE >                                                  |

|                                                                                       |
|---------------------------------------------------------------------------------------|
| Protein phosphatase 1D magnesium-dependent, delta isoform < tr Q80WV2 Q80WV2_MOUSE >  |
| GTP cyclohydrolase 1 feedback regulatory protein < sp P99025 GFRP_MOUSE >             |
| Histidine ammonia-lyase < sp P35492 HUTH_MOUSE >                                      |
| Xin actin-binding repeat-containing protein 2 < sp Q4U4S6 XIRP2_MOUSE >               |
| Complement C3 < sp P01027 CO3_MOUSE >                                                 |
| Pyrethroid hydrolase Ces2a < sp Q8QZR3 EST2A_MOUSE >                                  |
| Glutathione S-transferase theta 3 < tr Q99L20 Q99L20_MOUSE >                          |
| Isobutyryl-CoA dehydrogenase, mitochondrial < sp Q9D7B6 ACAD8_MOUSE >                 |
| Cytochrome P450 2C54 < sp Q6XVG2 CP254_MOUSE >                                        |
| Isochorismatase domain-containing protein 2A, mitochondrial < sp P85094 ISC2A_MOUSE > |
| Mitochondrial 10-formyltetrahydrofolate dehydrogenase < sp Q8K009 AL1L2_MOUSE >       |
| 60S ribosomal protein L23 < sp P62830 RL23_MOUSE >                                    |
| Alpha-1,4 glucan phosphorylase < tr Q3UEJ6 Q3UEJ6_MOUSE >                             |
| 39S ribosomal protein L3, mitochondrial < sp Q99N95 RM03_MOUSE >                      |
| 40S ribosomal protein S21 < sp Q9CQR2 RS21_MOUSE >                                    |
| Acyl-CoA synthetase family member 2, mitochondrial < sp Q8VCW8 ACSF2_MOUSE >          |
| Alkylated DNA repair protein alkB homolog 1 < sp POCB42 ALKB1_MOUSE >                 |
| ATP-binding cassette sub-family A member 1 < sp P41233 ABCA1_MOUSE >                  |
| Casein kinase II subunit beta < sp P67871 CSK2B_MOUSE >                               |
| Cathepsin H < tr Q922Q7 Q922Q7_MOUSE >                                                |
| Centrosomal protein of 290 kDa < sp Q6A078 CE290_MOUSE >                              |
| Cocaine- and amphetamine-regulated transcript protein < sp P56388 CART_MOUSE >        |
| Collagen alpha-1(VI) chain < sp Q04857 CO6A1_MOUSE >                                  |
| Dynein heavy chain 3, axonemal < sp Q8BW94 DYH3_MOUSE >                               |
| E3 ubiquitin-protein ligase UBR4 < sp A2AN08 UBR4_MOUSE >                             |
| EGAM1 < tr Q3UL53 Q3UL53_MOUSE >                                                      |
| EGAM1N < tr B6ZND8 B6ZND8_MOUSE >                                                     |
| Fgd6 protein < tr B2RSV7 B2RSV7_MOUSE >                                               |
| FYVE, RhoGEF and PH domain-containing protein 6 < sp Q69ZL1 FGD6_MOUSE >              |
| Heme-binding protein 1 < sp Q9R257 HEBP1_MOUSE >                                      |
| Heterogeneous nuclear ribonucleoprotein A1 < sp P49312 ROA1_MOUSE >                   |
| Hnrnpa1l2 protein < tr B7ZWG9 B7ZWG9_MOUSE >                                          |
| Homolog of human Werners syndrome protein < tr O35948 O35948_MOUSE >                  |
| Laminin subunit alpha-5 < sp Q61001 LAMA5_MOUSE >                                     |
| Little elongation complex subunit 1 < sp E9Q286 ICE1_MOUSE >                          |
| MCG148116 < tr Q9D9Z8 Q9D9Z8_MOUSE >                                                  |
| Mitochondrial carnitine/acylcarnitine carrier protein < sp Q9Z2Z6 MCAT_MOUSE >        |
| Mitochondrial ribosomal protein L3 < tr Q91XB2 Q91XB2_MOUSE >                         |
| Neuroguidin < sp Q9DB96 NGDN_MOUSE >                                                  |
| Nuclear-interacting partner of ALK < sp Q80YV2 NIPA_MOUSE >                           |
| Nucleoside diphosphate kinase A < tr Q5NC79 Q5NC79_MOUSE >                            |
| Palmitoyl-protein thioesterase < tr Q8VBX5 Q8VBX5_MOUSE >                             |
| Palmitoyl-protein thioesterase 1 < sp O88531 PPT1_MOUSE >                             |
| Parathyrosin < sp Q9D0J8 PTMS_MOUSE >                                                 |
| Peroxisomal trans-2-enoyl-CoA reductase < sp Q99MZ7 PECR_MOUSE >                      |
| Phospholipid-translocating ATPase < tr B9EJ52 B9EJ52_MOUSE >                          |
| Probable phospholipid-transporting ATPase VD < sp Q8K2X1 AT10D_MOUSE >                |
| Proteasome subunit beta type-5 < sp Q55234 PSB5_MOUSE >                               |
| Protein Crxos < tr V9GXY9 V9GXY9_MOUSE >                                              |
| Protein Styxl1 < tr D3YZ02 D3YZ02_MOUSE >                                             |
| Protein Taf4a < tr E9QAP7 E9QAP7_MOUSE >                                              |

|                                                                                                                    |
|--------------------------------------------------------------------------------------------------------------------|
| Protein Wdr72 < tr D3YYM4 D3YYM4_MOUSE >                                                                           |
| Protein Zfp948 < tr Q6DFU8 Q6DFU8_MOUSE >                                                                          |
| Protein Zfp955a < tr Q80XR7 Q80XR7_MOUSE >                                                                         |
| Protein Zfp955b < tr L7N232 L7N232_MOUSE >                                                                         |
| Ptms protein < tr Q66JR8 Q66JR8_MOUSE >                                                                            |
| Putative sodium-coupled neutral amino acid transporter 10 < sp Q5I012 S38AA_MOUSE >                                |
| Selection and upkeep of intraepithelial T-cells protein 5 < sp A7XUY5 SKIT5_MOUSE >                                |
| Serine/threonine-protein kinase mTOR < sp Q9JLN9 MTOR_MOUSE >                                                      |
| Solute carrier family 25 (Mitochondrial carnitine/acylcarnitine translocase), member 20 < tr Q7TPW6 Q7TPW6_MOUSE > |
| TBC1 domain family member 9 < sp Q3UYK3 TBCD9_MOUSE >                                                              |
| Transcription factor RFX3 < sp P48381 RFX3_MOUSE >                                                                 |
| V-set and transmembrane domain-containing protein 2A < sp Q8R0A6 VTM2A_MOUSE >                                     |
| Werner syndrome ATP-dependent helicase homolog < sp O09053 WRN_MOUSE >                                             |
| Aldo-keto reductase family 1, member C19 < tr G3X9Y6 G3X9Y6_MOUSE >                                                |
| Chromodomain-helicase-DNA-binding protein 6 < sp A3KFM7 CHD6_MOUSE >                                               |
| Cysteine sulfinic acid decarboxylase < sp Q9DBE0 CSAD_MOUSE >                                                      |
| E3 ubiquitin-protein ligase DTX1 < sp Q61010 DTX1_MOUSE >                                                          |
| Hgd protein < tr Q05BJ1 Q05BJ1_MOUSE >                                                                             |
| Histone-lysine N-methyltransferase < tr F8WI37 F8WI37_MOUSE >                                                      |
| Histone-lysine N-methyltransferase 2C < sp Q8BRH4 KMT2C_MOUSE >                                                    |
| Homogentisate 1, 2-dioxygenase < tr Q8CI38 Q8CI38_MOUSE >                                                          |
| Laminin subunit alpha-3 < sp Q61789 LAMA3_MOUSE >                                                                  |
| NADPH--cytochrome P450 reductase < sp P37040 NCPR_MOUSE >                                                          |
| Proteasome subunit beta type < tr D3YUM8 D3YUM8_MOUSE >                                                            |
| Protocadherin-8 < sp Q7TSK3 PCDH8_MOUSE >                                                                          |
| Ribosomal protein L5 < tr Q3TKR5 Q3TKR5_MOUSE >                                                                    |
| S-formylglutathione hydrolase < sp Q9R0P3 ESTD_MOUSE >                                                             |
| Tubulin beta-4A chain < sp Q9D6F9 TBB4A_MOUSE >                                                                    |
| Vesicle-associated membrane protein 1 < tr D3YTU0 D3YTU0_MOUSE >                                                   |
| IQ motif containing GTPase activating protein 2 < tr B9EKK3 B9EKK3_MOUSE >                                         |
| Peroxiredoxin-5, mitochondrial < sp P99029 PRDX5_MOUSE >                                                           |
| Ras GTPase-activating-like protein IQGAP2 < sp Q3UQ44 IQGA2_MOUSE >                                                |
| Terminal uridylyltransferase 7 < sp Q5BLK4 TUT7_MOUSE >                                                            |
| Uncharacterized protein < tr V9GX38 V9GX38_MOUSE >                                                                 |
| 4-aminobutyrate aminotransferase, mitochondrial < sp P61922 GABT_MOUSE >                                           |
| Glycogen [starch] synthase, liver < sp Q8VCB3 GYS2_MOUSE >                                                         |
| Ubiquitin-like modifier-activating enzyme 1 < sp Q02053 UBA1_MOUSE >                                               |
| Fatty acid-binding protein, intestinal < sp P55050 FABPI_MOUSE >                                                   |
| ATPase, Na+/K+ transporting, alpha 3 polypeptide < tr Q8VCE0 Q8VCE0_MOUSE >                                        |
| Inactive phospholipase C-like protein 1 < sp Q3USB7 PLCL1_MOUSE >                                                  |
| Probable 2-oxoglutarate dehydrogenase E1 component DHKTD1, mitochondrial < sp A2ATU0 DHTK1_MOUSE >                 |
| Sodium/potassium-transporting ATPase subunit alpha-3 < sp Q6PIC6 AT1A3_MOUSE >                                     |
| 17-beta-hydroxysteroid dehydrogenase type 6 < sp Q9R092 H17B6_MOUSE >                                              |
| Protein Agl < tr F8VPN4 F8VPN4_MOUSE >                                                                             |
| Heat shock cognate 71 kDa protein < tr Q504P4 Q504P4_MOUSE >                                                       |
