# Supplementary material for: The Role of Promyelocytic Leukemia Protein in Steatosis-Associated Hepatic Tumors Related to Chronic Hepatitis B virus Infection
Source: PubMed Central journal article supplement — Transl Oncol. 2018 Apr 24;11(3):743–54. doi: 10.1016/j.tranon.2018.03.013 (PMC6050444; doi:10.1016/j.tranon.2018.03.013), 2018-04-24
Supplement: mmc4.pdf [file mmc4.pdf]

**Table S4.** Gene methylation profiling in the livers of *wild-type*, *PML<sup>-/-</sup>*, *HBsAg<sup>tg/tg</sup>* and *PML<sup>-/-</sup>HBsAg<sup>tg/tg</sup>* mice with normal histology, dysplasia, or HCC development.

| Gene     | UMet: un-methylation percentage; Met: methylation percentage. |        |                                                                       |        |                                                                              |        |                                                     |        |                                                        |        |                                             |       |         |       |
|----------|---------------------------------------------------------------|--------|-----------------------------------------------------------------------|--------|------------------------------------------------------------------------------|--------|-----------------------------------------------------|--------|--------------------------------------------------------|--------|---------------------------------------------|-------|---------|-------|
|          | 335 ( <i>wild-type</i> , 10-mon, M)                           |        | 116 ( <i>PML<sup>-/-</sup>HBsAg<sup>tg/tg</sup></i> , 12-mon, HCC, M) |        | BM-39 ( <i>PML<sup>-/-</sup>HBsAg<sup>tg/tg</sup></i> , 8-mon, dysplasia, M) |        | 322 ( <i>PML<sup>-/-</sup></i> , 10-mon, normal, M) |        | 336 ( <i>HBsAg<sup>tg/tg</sup></i> , 6-mon, normal, M) |        | 424 ( <i>wild-type</i> , 18-mon, normal, M) |       |         |       |
|          | UMet                                                          | Met    | UMet                                                                  | Met    | UMet                                                                         | Met    | UMet                                                | Met    | UMet                                                   | Met    | UMet                                        | Met   | UMet    | Met   |
| Acb1b    | 99.91%                                                        | 0.09%  | 100.00%                                                               | 0.00%  | 100.00%                                                                      | 0.00%  | 99.82%                                              | 0.18%  | 99.92%                                                 | 0.08%  | 100.00%                                     | 0.00% | 100.00% | 0.00% |
| Aix3     | 98.99%                                                        | 1.01%  | 99.04%                                                                | 0.96%  | 99.82%                                                                       | 0.18%  | 98.94%                                              | 1.06%  | 99.55%                                                 | 0.45%  | 99.66%                                      | 0.34% | 99.66%  | 0.34% |
| Aix4     | 99.72%                                                        | 0.28%  | 99.95%                                                                | 0.05%  | 99.95%                                                                       | 0.05%  | 99.52%                                              | 0.48%  | 99.83%                                                 | 0.17%  | 99.92%                                      | 0.08% | 99.92%  | 0.08% |
| Apa1     | 99.92%                                                        | 0.08%  | 100.00%                                                               | 0.00%  | 100.00%                                                                      | 0.00%  | 100.00%                                             | 0.00%  | 100.00%                                                | 0.00%  | 100.00%                                     | 0.00% | 100.00% | 0.00% |
| Apa1a    | 99.81%                                                        | 0.19%  | 99.96%                                                                | 0.04%  | 99.98%                                                                       | 0.02%  | 99.60%                                              | 0.40%  | 99.87%                                                 | 0.13%  | 100.00%                                     | 0.00% | 100.00% | 0.00% |
| B4galnt2 | 100.00%                                                       | 0.00%  | 99.83%                                                                | 0.17%  | 99.93%                                                                       | 0.07%  | 99.59%                                              | 0.41%  | 99.84%                                                 | 0.16%  | 100.00%                                     | 0.00% | 100.00% | 0.00% |
| Bnip3    | 99.76%                                                        | 0.24%  | 99.75%                                                                | 0.25%  | 99.99%                                                                       | 0.01%  | 99.33%                                              | 0.67%  | 99.81%                                                 | 0.19%  | 99.91%                                      | 0.09% | 99.91%  | 0.09% |
| Bnip3l   | 100.00%                                                       | 0.00%  | 99.92%                                                                | 0.08%  | 100.00%                                                                      | 0.00%  | 100.00%                                             | 0.00%  | 100.00%                                                | 0.00%  | 100.00%                                     | 0.00% | 100.00% | 0.00% |
| Cacna1h  | 99.84%                                                        | 0.16%  | 99.92%                                                                | 0.08%  | 99.92%                                                                       | 0.08%  | 99.82%                                              | 0.18%  | 99.81%                                                 | 0.19%  | 99.79%                                      | 0.21% | 99.79%  | 0.21% |
| Cadm1    | 99.23%                                                        | 0.77%  | 99.64%                                                                | 0.36%  | 99.84%                                                                       | 0.16%  | 99.63%                                              | 0.37%  | 99.56%                                                 | 0.44%  | 99.84%                                      | 0.16% | 99.84%  | 0.16% |
| Casp3    | 99.23%                                                        | 0.77%  | 99.67%                                                                | 0.33%  | 99.73%                                                                       | 0.27%  | 99.30%                                              | 0.70%  | 99.29%                                                 | 0.71%  | 99.94%                                      | 0.06% | 99.94%  | 0.06% |
| Casp8    | 99.86%                                                        | 0.14%  | 100.00%                                                               | 0.00%  | 100.00%                                                                      | 0.00%  | 99.89%                                              | 0.11%  | 99.94%                                                 | 0.06%  | 100.00%                                     | 0.00% | 100.00% | 0.00% |
| Ccnd2    | 99.78%                                                        | 0.22%  | 99.48%                                                                | 0.52%  | 99.69%                                                                       | 0.31%  | 99.47%                                              | 0.53%  | 99.86%                                                 | 0.14%  | 99.91%                                      | 0.09% | 99.91%  | 0.09% |
| Cdh1     | 99.74%                                                        | 0.26%  | 99.67%                                                                | 0.33%  | 99.95%                                                                       | 0.05%  | 99.39%                                              | 0.61%  | 99.67%                                                 | 0.33%  | 100.00%                                     | 0.00% | 100.00% | 0.00% |
| Cdh13    | 93.71%                                                        | 6.29%  | 89.08%                                                                | 10.92% | 96.12%                                                                       | 3.88%  | 95.70%                                              | 4.30%  | 96.72%                                                 | 3.28%  | 96.79%                                      | 3.21% | 96.79%  | 3.21% |
| Cdkn1a   | 99.86%                                                        | 0.14%  | 100.00%                                                               | 0.00%  | 99.92%                                                                       | 0.08%  | 99.69%                                              | 0.31%  | 99.73%                                                 | 0.27%  | 99.93%                                      | 0.07% | 99.93%  | 0.07% |
| Cdkn1b   | 100.00%                                                       | 0.00%  | 99.92%                                                                | 0.08%  | 100.00%                                                                      | 0.00%  | 100.00%                                             | 0.00%  | 99.89%                                                 | 0.11%  | 99.95%                                      | 0.05% | 99.95%  | 0.05% |
| Cdkn1c   | 97.30%                                                        | 2.70%  | 43.77%                                                                | 56.23% | 45.65%                                                                       | 54.35% | 44.01%                                              | 55.99% | 95.06%                                                 | 4.94%  | 97.52%                                      | 2.48% | 97.52%  | 2.48% |
| Cdkn2a   | 99.50%                                                        | 0.50%  | 99.65%                                                                | 0.35%  | 99.36%                                                                       | 0.64%  | 99.71%                                              | 0.29%  | 99.32%                                                 | 0.68%  | 99.63%                                      | 0.37% | 99.63%  | 0.37% |
| Cdkn2b   | 99.28%                                                        | 0.72%  | 99.79%                                                                | 0.21%  | 99.30%                                                                       | 0.70%  | 99.15%                                              | 0.85%  | 99.44%                                                 | 0.56%  | 99.62%                                      | 0.38% | 99.62%  | 0.38% |
| Cdfr     | 99.57%                                                        | 0.43%  | 99.60%                                                                | 0.40%  | 99.64%                                                                       | 0.36%  | 98.93%                                              | 1.07%  | 98.84%                                                 | 1.16%  | 99.13%                                      | 0.87% | 99.13%  | 0.87% |
| Cttnb1   | 99.83%                                                        | 0.17%  | 99.82%                                                                | 0.18%  | 100.00%                                                                      | 0.00%  | 99.81%                                              | 0.19%  | 99.95%                                                 | 0.05%  | 99.98%                                      | 0.02% | 99.98%  | 0.02% |
| Dab2     | 97.48%                                                        | 2.52%  | 97.73%                                                                | 2.27%  | 97.95%                                                                       | 2.05%  | 97.74%                                              | 2.26%  | 96.50%                                                 | 3.50%  | 97.89%                                      | 2.11% | 97.89%  | 2.11% |
| Dab2ip   | 98.78%                                                        | 1.22%  | 99.46%                                                                | 0.54%  | 99.16%                                                                       | 0.84%  | 98.79%                                              | 1.21%  | 99.20%                                                 | 0.80%  | 99.73%                                      | 0.27% | 99.73%  | 0.27% |
| Dact1    | 99.99%                                                        | 0.01%  | 99.93%                                                                | 0.07%  | 99.99%                                                                       | 0.01%  | 99.81%                                              | 0.19%  | 99.99%                                                 | 0.01%  | 99.94%                                      | 0.06% | 99.94%  | 0.06% |
| Dapk1    | 99.85%                                                        | 0.15%  | 99.89%                                                                | 0.11%  | 100.00%                                                                      | 0.00%  | 100.00%                                             | 0.00%  | 100.00%                                                | 0.00%  | 100.00%                                     | 0.00% | 100.00% | 0.00% |
| Dbc1     | 99.22%                                                        | 0.78%  | 99.01%                                                                | 0.99%  | 99.89%                                                                       | 0.11%  | 99.48%                                              | 0.52%  | 99.60%                                                 | 0.40%  | 99.91%                                      | 0.09% | 99.91%  | 0.09% |
| Dkk3     | 94.08%                                                        | 5.92%  | 88.64%                                                                | 11.36% | 94.16%                                                                       | 5.84%  | 94.63%                                              | 5.37%  | 95.07%                                                 | 4.93%  | 94.62%                                      | 5.18% | 94.62%  | 5.18% |
| Dlc1     | 99.89%                                                        | 0.11%  | 99.45%                                                                | 0.55%  | 99.93%                                                                       | 0.07%  | 99.59%                                              | 0.41%  | 99.83%                                                 | 0.17%  | 100.00%                                     | 0.00% | 100.00% | 0.00% |
| Ebf3     | 100.00%                                                       | 0.00%  | 99.77%                                                                | 0.23%  | 100.00%                                                                      | 0.00%  | 100.00%                                             | 0.00%  | 99.88%                                                 | 0.12%  | 100.00%                                     | 0.00% | 100.00% | 0.00% |
| Egln2    | 100.00%                                                       | 0.00%  | 100.00%                                                               | 0.00%  | 100.00%                                                                      | 0.00%  | 99.96%                                              | 0.04%  | 99.92%                                                 | 0.08%  | 100.00%                                     | 0.00% | 100.00% | 0.00% |
| Ep300    | 99.98%                                                        | 0.02%  | 99.99%                                                                | 0.01%  | 99.99%                                                                       | 0.01%  | 99.95%                                              | 0.05%  | 99.91%                                                 | 0.09%  | 99.96%                                      | 0.04% | 99.96%  | 0.04% |
| Fhit     | 99.58%                                                        | 0.42%  | 99.62%                                                                | 0.38%  | 99.75%                                                                       | 0.25%  | 99.31%                                              | 0.69%  | 99.20%                                                 | 0.80%  | 99.93%                                      | 0.07% | 99.93%  | 0.07% |
| Gadd45b  | 99.86%                                                        | 0.14%  | 100.00%                                                               | 0.00%  | 99.94%                                                                       | 0.06%  | 99.88%                                              | 0.12%  | 100.00%                                                | 0.00%  | 99.92%                                      | 0.08% | 99.92%  | 0.08% |
| Gadd45g  | 99.93%                                                        | 0.07%  | 100.00%                                                               | 0.00%  | 99.94%                                                                       | 0.06%  | 99.74%                                              | 0.26%  | 99.99%                                                 | 0.01%  | 100.00%                                     | 0.00% | 100.00% | 0.00% |
| Gata3    | 94.17%                                                        | 5.83%  | 89.68%                                                                | 10.32% | 96.41%                                                                       | 3.59%  | 97.54%                                              | 2.46%  | 96.08%                                                 | 3.92%  | 97.34%                                      | 2.66% | 97.34%  | 2.66% |
| Gata4    | 99.46%                                                        | 0.54%  | 98.90%                                                                | 1.10%  | 99.29%                                                                       | 0.71%  | 98.65%                                              | 1.35%  | 98.18%                                                 | 1.82%  | 99.25%                                      | 0.75% | 99.25%  | 0.75% |
| Gata5    | 98.95%                                                        | 1.05%  | 98.60%                                                                | 1.40%  | 98.84%                                                                       | 1.16%  | 99.12%                                              | 0.88%  | 98.80%                                                 | 1.20%  | 99.38%                                      | 0.62% | 99.38%  | 0.62% |
| Gata6    | 94.83%                                                        | 5.17%  | 94.22%                                                                | 5.78%  | 94.79%                                                                       | 5.21%  | 90.77%                                              | 9.23%  | 94.03%                                                 | 5.97%  | 95.65%                                      | 4.35% | 95.65%  | 4.35% |
| Gstp1    | 99.17%                                                        | 0.83%  | 99.12%                                                                | 0.88%  | 99.24%                                                                       | 0.76%  | 98.24%                                              | 1.76%  | 99.12%                                                 | 0.88%  | 99.55%                                      | 0.45% | 99.55%  | 0.45% |
| Hhip     | 100.00%                                                       | 0.00%  | 99.98%                                                                | 0.02%  | 100.00%                                                                      | 0.00%  | 100.00%                                             | 0.00%  | 100.00%                                                | 0.00%  | 99.99%                                      | 0.01% | 99.99%  | 0.01% |
| Hic1     | 80.83%                                                        | 19.17% | 82.80%                                                                | 17.20% | 87.16%                                                                       | 12.84% | 87.72%                                              | 12.28% | 83.22%                                                 | 16.78% | 91.12%                                      | 8.88% | 91.12%  | 8.88% |
| Hrasls   | 99.94%                                                        | 0.06%  | 99.80%                                                                | 0.20%  | 100.00%                                                                      | 0.00%  | 100.00%                                             | 0.00%  | 100.00%                                                | 0.00%  | 100.00%                                     | 0.00% | 100.00% | 0.00% |
| Igf2     | 99.43%                                                        | 0.57%  | 98.86%                                                                | 1.14%  | 99.43%                                                                       | 0.57%  | 99.25%                                              | 0.75%  | 98.91%                                                 | 1.09%  | 99.19%                                      | 0.81% | 99.19%  | 0.81% |
| Igfbp3   | 99.73%                                                        | 0.27%  | 99.94%                                                                | 0.06%  | 99.88%                                                                       | 0.12%  | 99.67%                                              | 0.33%  | 99.89%                                                 | 0.11%  | 99.97%                                      | 0.03% | 99.97%  | 0.03% |
| Igfbp7   | 99.30%                                                        | 0.70%  | 99.30%                                                                | 0.70%  | 99.25%                                                                       | 0.75%  | 99.40%                                              | 0.60%  | 98.83%                                                 | 1.17%  | 99.43%                                      | 0.57% | 99.35%  | 0.65% |
| Irf1     | 99.64%                                                        | 0.36%  | 99.91%                                                                | 0.09%  | 99.87%                                                                       | 0.13%  | 99.56%                                              | 0.44%  | 99.86%                                                 | 0.14%  | 99.90%                                      | 0.10% | 99.90%  | 0.10% |
| Jup      | 99.71%                                                        | 0.29%  | 99.87%                                                                | 0.13%  | 99.96%                                                                       | 0.04%  | 99.87%                                              | 0.13%  | 99.68%                                                 | 0.32%  | 99.98%                                      | 0.02% | 99.98%  | 0.02% |
| Lox      | 100.00%                                                       | 0.00%  | 99.92%                                                                | 0.08%  | 99.95%                                                                       | 0.05%  | 99.71%                                              | 0.29%  | 99.98%                                                 | 0.02%  | 99.97%                                      | 0.03% | 99.97%  | 0.03% |
| Mad2l1   | 99.91%                                                        | 0.09%  | 99.96%                                                                | 0.04%  | 99.93%                                                                       | 0.07%  | 99.58%                                              | 0.42%  | 99.95%                                                 | 0.05%  | 100.00%                                     | 0.00% | 100.00% | 0.00% |
| Mcl1     | 100.00%                                                       | 0.00%  | 99.90%                                                                | 0.10%  | 99.93%                                                                       | 0.07%  | 99.81%                                              | 0.19%  | 100.00%                                                | 0.00%  | 100.00%                                     | 0.00% | 100.00% | 0.00% |
| Mih1     | 99.07%                                                        | 0.93%  | 99.39%                                                                | 0.61%  | 99.35%                                                                       | 0.65%  | 99.21%                                              | 0.79%  | 99.06%                                                 | 0.94%  | 99.92%                                      | 0.08% | 99.92%  | 0.08% |
| Msh2     | 100.00%                                                       | 0.00%  | 100.00%                                                               | 0.00%  | 100.00%                                                                      | 0.00%  | 100.00%                                             | 0.00%  | 100.00%                                                | 0.00%  | 100.00%                                     | 0.00% | 100.00% | 0.00% |
| Msh3     | 99.89%                                                        | 0.11%  | 99.97%                                                                | 0.03%  | 99.98%                                                                       | 0.02%  | 99.78%                                              | 0.22%  | 99.96%                                                 | 0.04%  | 99.99%                                      | 0.01% | 99.99%  | 0.01% |
| Myd1     | 93.78%                                                        | 6.22%  | 95.59%                                                                | 4.41%  | 97.79%                                                                       | 2.21%  | 92.29%                                              | 7.71%  | 97.36%                                                 | 2.64%  | 97.62%                                      | 2.38% | 97.62%  | 2.38% |
| Nae1     | 100.00%                                                       | 0.00%  | 100.00%                                                               | 0.00%  | 100.00%                                                                      | 0.00%  | 100.00%                                             | 0.00%  | 99.89%                                                 | 0.11%  | 100.00%                                     | 0.00% | 100.00% | 0.00% |
| Ndrp2    | 99.33%                                                        | 0.67%  | 99.16%                                                                | 0.84%  | 99.20%                                                                       | 0.80%  | 98.87%                                              | 1.13%  | 98.81%                                                 | 1.19%  | 99.36%                                      | 0.64% | 99.36%  | 0.64% |
| Ndufa13  | 99.56%                                                        | 0.44%  | 45.73%                                                                | 54.27% | 47.53%                                                                       | 52.47% | 49.49%                                              | 50.51% | 99.62%                                                 | 0.38%  | 99.52%                                      | 0.48% | 99.52%  | 0.48% |
| Ogdh1    | 99.93%                                                        | 0.07%  | 99.82%                                                                | 0.18%  | 99.91%                                                                       | 0.09%  | 99.48%                                              | 0.52%  | 99.53%                                                 | 0.47%  | 99.94%                                      | 0.06% | 99.94%  | 0.06% |
| Osrm     | 99.94%                                                        | 0.06%  | 100.00%                                                               | 0.00%  | 99.96%                                                                       | 0.04%  | 99.90%                                              | 0.10%  | 100.00%                                                | 0.00%  | 100.00%                                     | 0.00% | 100.00% | 0.00% |
| Otdc4    | 100.00%                                                       | 0.00%  | 100.00%                                                               | 0.00%  | 100.00%                                                                      | 0.00%  | 99.87%                                              | 0.13%  | 100.00%                                                | 0.00%  | 100.00%                                     | 0.00% | 100.00% | 0.00% |
| Pou3f1   | 99.30%                                                        | 0.70%  | 99.61%                                                                | 0.39%  | 99.64%                                                                       | 0.36%  | 99.12%                                              | 0.88%  | 99.31%                                                 | 0.69%  | 100.00%                                     | 0.00% | 100.00% | 0.00% |
| Prdm2    | 88.57%                                                        | 11.43% | 92.34%                                                                | 7.66%  | 90.91%                                                                       | 9.09%  | 91.54%                                              | 8.46%  | 89.57%                                                 | 10.43% | 90.81%                                      | 9.19% | 90.81%  | 9.19% |
| Prdm5    | 99.45%                                                        | 0.55%  | 98.35%                                                                | 1.65%  | 99.75%                                                                       | 0.25%  | 99.75%                                              | 0.25%  | 99.86%                                                 | 0.14%  | 99.50%                                      | 0.50% | 99.50%  | 0.50% |
| Pten     | 99.85%                                                        | 0.15%  | 99.92%                                                                | 0.08%  | 100.00%                                                                      | 0.00%  | 100.00%                                             | 0.00%  | 100.00%                                                | 0.00%  | 100.00%                                     | 0.00% | 100.00% | 0.00% |
| Ptpro    | 99.96%                                                        | 0.04%  | 99.69%                                                                | 0.31%  | 100.00%                                                                      | 0.00%  | 99.93%                                              | 0.07%  | 100.00%                                                | 0.00%  | 99.93%                                      | 0.07% | 99.93%  | 0.07% |
| Rad23a   | 99.97%                                                        | 0.03%  | 99.92%                                                                | 0.08%  | 99.99%                                                                       | 0.01%  | 99.77%                                              | 0.23%  | 99.85%                                                 | 0.15%  | 99.97%                                      | 0.03% | 99.97%  | 0.03% |
| Rarb     | 97.42%                                                        | 2.58%  | 99.31%                                                                | 0.69%  | 99.40%                                                                       | 0.60%  | 97.95%                                              | 2.05%  | 99.16%                                                 | 0.84%  | 99.89%                                      | 0.11% | 99.89%  | 0.11% |
| Rasl10a  | 99.73%                                                        | 0.27%  | 99.90%                                                                | 0.10%  | 99.67%                                                                       | 0.33%  | 99.59%                                              | 0.41%  | 99.54%                                                 | 0.46%  | 99.85%                                      | 0.15% | 99.85%  | 0.15% |
| Rassf1   | 99.12%                                                        | 0.88%  | 99.53%                                                                | 0.47%  | 99.37%                                                                       | 0.63%  | 99.12%                                              | 0.88%  | 98.97%                                                 | 1.03%  | 99.64%                                      | 0.36% | 99.64%  | 0.36% |
| Rassf3   | 99.73%                                                        | 0.27%  | 99.74%                                                                | 0.26%  | 99.88%                                                                       | 0.12%  | 99.79%                                              | 0.21%  | 99.82%                                                 | 0.18%  | 99.77%                                      | 0.23% | 99.77%  | 0.23% |
| Rassf4   | 98.97%                                                        | 1.03%  | 98.31%                                                                | 1.69%  | 99.33%                                                                       | 0.67%  | 99.43%                                              | 0.57%  | 98.69%                                                 | 1.31%  | 99.33%                                      | 0.67% | 99.33%  | 0.67% |
| Rassf5   | 100.00%                                                       | 0.00%  | 99.90%                                                                | 0.10%  | 99.97%                                                                       | 0.03%  | 99.68%                                              | 0.32%  | 99.60%                                                 | 0.40%  | 99.83%                                      | 0.17% | 99.83%  | 0.17% |
| Rbp1     | 99.86%                                                        | 0.14%  | 99.88%                                                                | 0.12%  | 99.96%                                                                       | 0.04%  | 99.69%                                              | 0.31%  | 99.92%                                                 | 0.08%  | 99.95%                                      | 0.05% | 99.95%  | 0.05% |
| Reln     | 100.00%                                                       | 0.00%  | 100.00%                                                               | 0.00%  | 100.00%                                                                      | 0.00%  | 99.98%                                              | 0.02%  | 100.00%                                                | 0.00%  | 100.00%                                     | 0.00% | 100.00% | 0.00% |
| Rprm     | 100.00%                                                       | 0.00%  | 100.00%                                                               | 0.00%  | 100.00%                                                                      | 0.00%  | 99.67%                                              | 0.33%  | 100.00%                                                | 0.00%  | 100.00%                                     | 0.00% | 100.00% | 0.00% |
| Rps15    | 99.59%                                                        | 0.41%  | 99.60%                                                                | 0.40%  | 99.75%                                                                       | 0.25%  | 99.29%                                              | 0.71%  | 99.08%                                                 | 0.92%  | 99.75%                                      | 0.25% | 99.75%  | 0.25% |
| Sema3b   | 99.41%                                                        | 0.59%  | 99.18%                                                                | 0.82%  | 99.82%                                                                       | 0.18%  | 98.86%                                              | 1.14%  | 99.61%                                                 | 0.39%  | 99.54%                                      | 0.46% | 99.54%  | 0.46% |
| Sirp1    | 100.00%                                                       | 0.00%  | 99.92%                                                                | 0.08%  | 100.00%                                                                      | 0.00%  | 100.00%                                             | 0.00%  | 100.00%                                                | 0.00%  | 100.00%                                     | 0.00% | 100.00% | 0.00% |
| Sirp2    | 99.88%                                                        | 0.12%  | 99.83%                                                                | 0.17%  | 99.99%                                                                       | 0.01%  | 99.86%                                              | 0.14%  | 99.99%                                                 | 0.01%  | 100.00%                                     | 0.00% | 100.00% | 0.00% |
| Sirp4    | 99.21%                                                        | 0.79%  | 99.62%                                                                |        |                                                                              |        |                                                     |        |                                                        |        |                                             |       |         |       |
